# Supplementary material
Source: PubMed Central journal article supplement (PMC8569286)
Supplement: NIHMS1749221-supplement-Supplemental_Material.pdf [file NIHMS1749221-supplement-Supplemental_Material.pdf]

- 43 (11) Centre for Genomics and Personalised Health, School of Biomedical Sciences,  
44 Queensland University of Technology, Brisbane, Australia
- 45 (12) Clinic for General Pediatrics, University Hospital Münster, Münster, Germany
- 46 (13) Division of Clinical Immunology and Allergy, Department of Pediatrics and Child  
47 Health, University of Manitoba, Winnipeg, Canada
- 48 (14) Department of Pediatrics, Security Forces Hospital, Riyadh, Saudi Arabia
- 49 (15) Division of Pediatric Clinical Immunology and Allergy, Department of Pediatrics  
50 and Child Health, University of Manitoba, Winnipeg, Canada
- 51 (16) Division of Nephrology, Harvard Medical School, Boston Children's Hospital,  
52 Boston, USA
- 53 (17) Department of Pediatrics, Center of Pediatric Nephrology and Transplantation,  
54 Cairo University, Cairo, Egypt
- 55 (18) Department of Human Genetics, Hannover Medical School, Hannover, Germany
- 56 (19) Department of Paediatric Pulmonology, Allergy and Neonatology, Hannover  
57 Medical School, Hannover, Germany
- 58 (20) Division of Neuropediatrics and Pediatric Metabolic Medicine, Center for Pediatric  
59 and Adolescent Medicine, University Hospital Heidelberg, Heidelberg, Germany.
- 60 (21) Division of Pediatric Hematology and Oncology, Cantonal Hospital Aarau, Aarau,  
61 Switzerland
- 62 (22) Institute of Virology, Medical Center - University of Freiburg, Freiburg, Germany;  
63 Faculty of Medicine, University of Freiburg, Freiburg, Germany
- 64 (23) Institute of Medical Virology, University of Zurich, Zurich, Switzerland
- 65 (24) Division of Pediatric Gastroenterology and Hepatology, University Hospital  
66 Tübingen, Tübingen, Germany
- 67 (25) Department of Internal Medicine IV (Nephrology), University Medical Center  
68 Freiburg, Faculty of Medicine, University of Freiburg, Germany
- 69 (26) Department of Pediatric and Neonatal Intensive Care, University Children's  
70 Hospital Zurich, Zurich, Switzerland
- 71 (27) Division of Nephrology, University Children's Hospital Zurich, Zurich, Switzerland;  
72 Prof. Dr. G. Laube is now at the Cantonal Hospital Baden, Baden, Switzerland
- 73 (28) Division of Neuroradiology, Department of Diagnostic Imaging and Intervention,  
74 University Children's Hospital Zurich, Zurich, Switzerland
- 75 (29) Institute of Pathology, University of Würzburg, Würzburg, Germany
- 76 (30) Department of Pathology and Immunology, University of Geneva, Geneva,  
77 Switzerland
- 78 (31) Department of Pathology and Molecular Pathology, and Institute of Molecular  
79 Cancer Research (IMCR), University Hospital and University Zurich, Zurich,  
80 Switzerland
- 81 (32) Biozentrum, University of Basel, Basel, Switzerland
- 82 (33) Centre for Clinical Genetics, Sydney Children's Hospital, Randwick, NSW,  
83 Sydney, Australia
- 84 (34) Prince of Wales Clinical School, University of New South Wales, Sydney,  
85 Australia

86 (35) Neuroscience Research Australia (NeuRA), University of New South Wales,  
87 Sydney, Australia

88 (36) Pediatric Immunology, University of Zurich, Zurich, Switzerland

89

90 #Joint First Authors

91 \*Joint Senior Authors

92

93 Corresponding authors:

94 Dr. Jana Pachlopnik Schmid, Division of Immunology, University Children's Hospital  
95 Zurich, Steinwiesstr. 75, 8032 Zurich, Switzerland, jana.pachlopnik@kispi.uzh.ch.

96 Dr. Raif Geha, Division of Immunology, Boston Children's Hospital, Harvard Medical  
97 School, Boston, United States, Geha, raif.geha@childrens.harvard.edu.

98

99 **CONTENT:**

100

101 **1. Author contributions..... page 4**

102 **2. Supplementary Material and Methods..... page 5**

103 **3. Supplementary Patient Clinical Histories ..... page 9**

104 **4. Supplementary Tables ..... page 18**

105 **5. Supplementary Figures..... page 26**

106 **6. Supplementary References ..... page 35**

107

108

109

110 **1. AUTHOR CONTRIBUTIONS**

111

112 SV designed and performed experiments and wrote the manuscript. JC and LEF  
113 designed and performed experiments and contributed to writing of the manuscript. VH  
114 performed experiments. LO performed bioinformatics analyses of exome sequencing and  
115 transcriptomic data. PJ performed genetic analyses and initiated international collaboration.  
116 CJF and SP contributed to data collection, patients' care and writing of the manuscript. XG  
117 contributed to data collection. MG, JH and LAS contributed to data collection and genetic  
118 analysis. MEM contributed to data collection and patients' care. YZ, HOm, TK, HOI, and PF  
119 performed genetic analyses. GE and MTG contributed to data collection. MF, CG, CK, and  
120 UB contributed to data collection and patients' care. CK and TR contributed to data collection  
121 from patients. TR, VK, CP, AA and SvH contributed to genetic analyses and data collection  
122 from patients. RP and TM performed flow cytometry experiments. DK, ME and SW contributed  
123 to experiments. NAS and DL contributed to data collection and patients' care. AKF, ES, SH,  
124 KH, MFB, FH, TG, GL, BB, and CS contributed to patients' care. MH performed viral  
125 metagenomic analyses. SE contributed to the design of experiments, data interpretation and  
126 patients' care. RK performed the assessment of neuro-radiological images. SR performed  
127 histological analysis of lung tissue. SM performed histological analysis of kidney tissue. HK  
128 and SH performed protein structure prediction modelling. AW performed histological analysis  
129 of liver tissue. RG contributed to data interpretation and writing of the manuscript. TR  
130 performed genetic analyses, contributed to data collection and writing of the manuscript.  
131 MG contributed to patients' care, project initiation via the chILD-Eu registry and biobank, data  
132 collection and writing of the manuscript. JPS set up the Genetic Study of  
133 Immunodeficiency, contributed to patients' care, data collection, wrote the manuscript and  
134 coordinated the study. All authors critically read, revised and approved the final version of the  
135 manuscript.

136



## 2. SUPPLEMENTARY MATERIAL AND METHODS

### Study participants

The patients were enrolled in ongoing, institutional-review-board (IRB)-approved studies of monogenic diseases at the Prince of Wales Hospital (Randwick, Australia: IRB references 13/094 and LNR/13/SCHN/112), the University Hospital Münster (Münster, Germany: IRB reference: AZ 2012-373-f-S), the University of Munich (Munich, Germany; ClinicalTrials.gov. NCT02852928; IRB reference: EK 111-13, 20-329), the Hannover Medical School (Hannover, Germany; IRB reference: EK 8657\_BO\_K\_2019), the Boston Children's Hospital (Boston, United States IRB reference: 04-09-113R), and the Division of Immunology at the University Children's Hospital Zurich (Zurich, Switzerland; ClinicalTrials.gov. NCT02735824; IRB reference: PB\_2016\_02280). For the definition of HLH, the HLH-2004 study group criteria have been used (1). For the definition of acute liver failure, the PALF study group criteria have been used (2)

### Next-generation sequencing and variant annotation

Next-generation sequencing was performed and analyzed at New South Wales Health Pathology (NSWHP) Randwick Genomic Laboratory (Sydney, Australia) using either Illumina or Thermo Fisher platforms, as described previously (3). Data were filtered using an in-house genomic annotation and interface application (GAIA), which overlies GEMINI v20.1 and has been approved by the National Association of Testing Authorities, Australia (4). Reads were aligned with the Human Genome Reference Sequence hg19/GRCh37 and single nucleotide and short indel variants were called as described previously (3).

Variant quality was assessed using quality score recalibration and the variants were then annotated using the Ensembl Variant Effect Predictor (<http://www.ensembl.org/info/docs/tools/vep/index.html>). Targeted-exome sequencing of genomic DNA was performed at the Cologne Center for Genomics (Cologne, Germany). Agilent SureSelect (version 6-r2) was used for enrichment. Enriched preparations were sequenced with the HiSeq2000 platform (Illumina) as paired-end 2 × 100 bp reads. The proportion of 30× coverage in the targeted regions was greater than 80%. In order to identify relevant mutations, a whole-genome homozygosity mapping and exome sequencing strategy was applied to kindreds 1 and 5.

### Variant prioritization and classification

Variants that were too frequent to cause a fully penetrant Mendelian disorder were de-prioritized, with a threshold frequency (based on the Exome Aggregation Consortium, gnomAD, the 1000 Genomes Project, and the NSWHP in-house database) of >2% for homozygous and compound heterozygous inheritance models and >0.1% for heterozygous inheritance models. Variants predicted to have a low impact on protein function by the GEMINI software tool were also de-prioritized (4). Each of the remaining rare variants were reviewed by skilled analysts and classified according to the American College of Medical Genetics and Genomics guidelines (5) as subsequently modified (6, 7) to incorporate aspects of the scoring system reported by Karbassi et al (8). Variant quality was checked by inspecting the sequence data after binary sequence alignment map (.bam) files had been uploaded into the Integrative

181 Genomics Viewer (9). The following parameters were analyzed for each variant: the type of  
182 mutation (null/truncating, missense, synonymous, in-frame deletion variant, etc.), zygosity,  
183 inheritance pattern, frequency in the population, allele case frequency (from disease-specific  
184 publications and ClinVar), conservation, protein/domain structure, associated phenotypes,  
185 predicted pathogenicity (in SIFT, PolyPhen2, CADD, and ClinPred), functional/animal studies,  
186 and the disease's mutation spectrum. Genematcher was used as to connect the investigators,  
187 on the basis of their common interest in the candidate gene *ZNFX1* (10)  
188

### 189 **Statistical analysis**

190 Two-way ANOVA, Sidak's multiple comparisons test was used. Non liner  
191 regression and half-life were calculated using exponential (Malthusian) growth. All statistical  
192 analyses were performed with GraphPad Prism software (version 8.4.2, GraphPad Inc., La  
193 Jolla, CA).  
194

### 195 **Prediction of protein homology model**

196 Domains were searched for with the NCBI CDD database 4-6, and the protein similarity  
197 search was performed with HHPred7 (11-14). The Walker A motif was matched to the  
198 consensus sequence (G/A)XXXXGK(T/S)Y, and zinc fingers were matched to the sequence  
199 C-X(1-6)-H-X-C-X3-C(H/C)-X(3-4)-(H/C)-X(1-10)-C. The hit with the greatest sequence  
200 coverage versus the X-ray structure (PDB ID: 4PJ3) was used as a template model for *ZNFX1*  
201 from residues 183 to 1255, using MODELLER8 (15). The homology structure was viewed and  
202 analyzed with PyMOL9 (16).  
203

### 204 **Tissue expression**

205 The Human MTC Panel I and Human Immune System MTC Panel (Takara) were used  
206 as normalized, first-strand cDNA library preparations from RNA extracted from the indicated  
207 tissues. The following TaqMan probe/primer sets (Thermo Fisher Scientific) were used:  
208 Hs99999901 for 18S, and Hs01105231 for *ZNFX1* in combination with the TaqMan Fast  
209 Advance Master Mix (Thermo Fisher Scientific). The qPCR assay was carried out on a C1000  
210 Touch™ thermal cycler equipped with a CFX384 Touch™ real-time detection system (Bio-  
211 Rad).  
212

### 213 **Transcriptomic profiling**

214 mRNA was isolated from control and patient fibroblasts, stimulated as indicated. cDNA  
215 then synthesized from 10 ng of total RNA using SuperScript™ VILO™ cDNA Synthesis Kit  
216 (11754050, ThermoFisher Scientific). Barcoded libraries were prepared using the Ion  
217 AmpliSeq Transcriptome Human Gene Expression Kit as per the manufacturer's protocol and  
218 sequenced using an Ion S5™ system. Differential gene expression analysis was performed  
219 using the ampliSeqRNA plugin (ThermoFisher). Pathway analysis was done using Ingenuity  
220 Pathway Analysis (Qiagen) and Gene Set Enrichment Analysis, using adjusted p values of  
221 <0.01 and fold-change greater than 1.5 or less than -1.5.  
222

### 223 **Fibroblast stimulation assay**

224 Primary human dermal fibroblasts were grown in Dulbecco's Modified Eagle Medium  
225 (DMEM) (Thermo Fisher Scientific) supplemented with 10% fetal bovine serum (FBS). The  
226 cells were transfected with poly(dA:dT)/LyoVec and poly(I:C)(HMW)/LyoVec, or treated with  
227 soluble poly(I:C)(HMW) (Invivogen), according to manufacturer guidelines. Briefly, 500 ng/ml  
228 of poly(dA:dT)Lyovec, poly(I:C)HMW-LyoVec or poly(I:C)HMW were added to 75% confluent  
229 dermal fibroblast cultures. At the indicated time point, the culture medium was removed and  
230 the cells were resuspended in Trizol reagent (Thermo Fisher Scientific) for RNA isolation.

231 For transcriptomic analysis primary dermal fibroblasts from patients and controls were  
232 stimulated with 3 µg/mL of poly(I:C)HMW or transfected with 3 µg/mL of Lyovec-poly(I:C)HMW  
233 or 3 µg/mL Lyovec-poly(dA:dT) (Invivogen).  
234

### 235 **Viral infection assay.**

236 PBMCs from patients and healthy donors (CTRL) were pre-treated with different  
237 concentrations of Lyovec-poly(I:C)HMW for 12 hours followed by infection with VSV-GFP. Five  
238 hours after infection, cells were harvested and GFP expression measured on monocytes by  
239 flow cytometry.

240

### 241 **Detection of ZNFX1 by Western blotting**

242 Primary dermal fibroblasts were lysed in RIPA buffer (Thermo Fisher Scientific)  
243 supplemented with MINI protease inhibitor cocktail (Roche) under resting conditions or 24 h  
244 after transfection with 0.5 µg/ml poly(dA:dT)/LyoVec or 0.5 µg/ml poly(I:C)(HMW)/LyoVec  
245 (Invivogen), as described above. Protein concentrations were assayed using Bradford's  
246 method (Bio-Rad). Next, 20 µg of protein extracts were resolved on Criterion TGX 4-15%  
247 precast gels (Bio-Rad) and transferred to PVDF membranes using Trans-Blot Turbo (Bio-Rad).  
248 ZNFX1 was detected with rabbit-mAb (Abcam, clone EPR12330) and HRP-conjugated goat  
249 anti-rabbit antibody (Thermo Fisher Scientific). As a loading control, actin was detected with  
250 rhodamine-conjugated anti-actin heavy antigen-binding fragment (Bio-Rad). Images were  
251 acquired with the Chemidoc MP system (Bio-Rad) and analyzed with Image Lab software  
252 (version 6.0.1, build 34, Standard Edition; Bio-Rad).

253

### 254 **RNA isolation**

255 Blood samples from patients and their parents were collected in PAXgene tubes (BD  
256 Biosciences) and RNA was isolated using the PAXgene System. RNA from dermal fibroblasts  
257 cultures was isolated using the Trizol Plus RNA Isolation Kit (Thermo Fisher Scientific).  
258

259

### 259 **Quantitative polymerase chain reaction (qPCR)**

260 RNA was reverse-transcribed using the Superscript IV Vilo Master Mix (Thermo Fisher  
261 Scientific), according to the manufacturer's instructions. The following TaqMan probe/primer  
262 (Thermo Fisher Scientific) sets were used: Hs99999901 for 18S, Hs0089508 for MX1, NH  
263 027866424 for GAPDH, Hs00973635 for OAS1, Hs001966324 for OAS3 and Hs00942643 for  
264 OAS2, in combination with the TaqMan Fast Advance Master Mix (Thermo Fisher Scientific).  
265 The qPCR assay was carried out on a C1000 Touch™ thermal cycler equipped with a CFX384

266 Touch™ real-time detection system (Bio-Rad). Data were analyzed using CFX Maestro 1.1  
267 software (Bio-Rad).

268

### 269 **RNA stability assay**

270 Dermal fibroblasts were plated in 24-well tissue culture plates and transfected with 500  
271 ng/ml Lyovec-poly(dA:dT), as described above. Eighteen hours later, 500 µg/ml of the  
272 polymerase II inhibitor 5,6-dichlorobenzimidazole 1-β-D-ribofuranoside (Merck) was added to  
273 the cultures. At the indicated time points, the growth medium was removed, and the cells were  
274 resuspended in Trizol reagent (Thermo Fisher Scientific) for RNA isolation.

275

### 276 **Metagenomic viral sequencing:**

277 Viral metagenomic sequencing was performed as previously described (Kufner et al. Two  
278 Years of Viral Metagenomics in a Tertiary Diagnostics Unit: Evaluation of the First 105 Cases.  
279 genes 10, 2019). Briefly, samples were pre-processed upon arrival and nucleic acid extracts  
280 were collected, followed by reverse transcription with random hexamers and second strand  
281 synthesis. Sequencing libraries were constructed using the NexteraXT protocol (Illumina, San  
282 Diego, CA, USA) and sequenced on an Illumina MiSeq for 1 x 151 cycles using version 3  
283 chemistry. Analysis was performed using the in-house pipeline VirMet.

284

### 285 **ZNFX1 overexpression:**

286 Dermal fibroblasts were transfected with pFN21A-ZNFX1 (Promega) together with  
287 pcDNA6.2/EmGFP-Bsd/V5-DEST (ThermoFisher). Transfectants were then selectively  
288 enriched in DMEM-10%FBS medium supplemented with blasticidin for three days, followed by  
289 one day resting in plain medium prior to stimulation. Viability of transfectants was assessed by  
290 measurement of Caspase 3, Caspase 8 and Caspase 9 in a fluorometric multiplex activity  
291 assay (Abcam). Transfection efficiency following selective enrichment was over 65% as  
292 assessed by flow cytometric analysis after staining of HaloTag with the HaloTag-TMR ligand  
293 (Promega).

294

295 **3. SUPPLEMENTARY PATIENT CLINICAL HISTORIES**

296

297 **Kindred 1. P1.1, P1.2 and P1.3** were born to consanguineous parents of Arabic  
298 origin. **P1.1** (the parents' first child) was born in Iraq. She presented with failure to thrive from  
299 birth onwards, severe general weakness, and hepatitis. At the age of 6 months, she developed  
300 recurrent pneumonia and anemia; a clinical examination revealed lymphadenopathy and  
301 hepatomegaly. The patient died at the age of 2.7 years.

302

303 Her 1.5 year younger sister (**P 1.2**, the index patient) presented with afebrile seizures  
304 at the age of 6 months. A second seizure (with a normal EEG) occurred one month later and  
305 was followed by a first episode of pneumonia. Due to recurrent lung infections, she developed  
306 chronic lung disease, with evidence of cholesterol pneumonitis on a lung biopsy. Tuberculin  
307 conversion was diagnosed at the age of 9 months and treated with isoniazid.

308 At the age of 1.5 years, the seizures became frequent (once a week) and  
309 anticonvulsant medication (oxcarbazepine) was initiated. At that time, she had short stature,  
310 palmar erythema, hepatosplenomegaly, and finger clubbing.

311 At 3 years of age, chronic polyarthritis was diagnosed, with recurrent arthritic swelling  
312 of the hips, knees, and elbows. The patient was treated with steroids, methotrexate and  
313 azathioprine. Failure to thrive worsened, and abdominal pain appeared. Homozygous lactase  
314 deficiency was diagnosed, although a reduction in lactose intake did not completely abolish  
315 the symptoms. At the same time, mediastinal and hilar lymphadenopathy developed.

316 At 7 years of age, the patient had a severe H1N1 pneumonia. She had moderate to  
317 severe restrictive lung function impairment.

318 At 8 years of age, the patient developed a right and left ventricular dilatation developed  
319 as a result of pulmonary hypertension. Due to a progressive decline in lung function and  
320 respiratory failure, the patient underwent lung transplantation at the age of 10 years.  
321 Bronchiolitis obliterans developed after the transplantation.

322 A year later, a lung biopsy revealed post-transplant lymphoproliferative disease.  
323 At the age of 13, liver infection with *Mycobacterium kansasii* was diagnosed on a liver biopsy,  
324 with extensive lymphoid infiltrations and granulomatous reactions.

325 One year later, the patient developed hypothyroidism, and thyroid hormone  
326 replacement therapy was initiated. At the same age, the patient's lung function started to  
327 decrease rapidly, and a repeat transplant was considered. However, this was ruled out by a  
328 severe concomitant adenovirus infection, and the patient died of respiratory failure. The  
329 autopsy demonstrated chronic necrotizing pulmonary aspergillosis, diffuse alveolar damage,  
330 and hepatic sinusoidal dilatation.

331

332 **P1.3** (P1.2's brother, 6 years younger) was born in Germany and presented with  
333 hypoxemia, prolonged and severe jaundice, and failure to thrive soon after birth. Tetralogy of  
334 Fallot and patent foramen ovale were diagnosed; cardiac catheterization was performed at the  
335 age of 1 month. Concurrently, the child developed recurrent thrombocytopenia (24 G/L) without  
336 any evidence of sepsis. A lung biopsy obtained during cardiac surgery showed cellular  
337 interstitial pneumonitis, which was treated with azathioprine and prednisolone. At the age of 5  
338 months, the patient developed a respiratory tract infection with hepatosplenomegaly.

339 Intestinal invagination was observed at 6 months of age, and ileocecal resection was  
340 necessary. The biopsy showed an inflammatory conglomerate tumor in the right lower  
341 abdominal area, with a distended appendix.

342 At this time, the patient's transaminase level rose sharply (ASAT: 3145 U/l; ALAT: 833  
343 U/l). He had fever, hepatosplenomegaly, transfusion-dependent anemia, thrombocytopenia,  
344 coagulopathy (with a requirement for fresh frozen plasma), mild elevation of triglycerides (3.32  
345 mmol/l) and an elevated serum soluble IL-2 receptor level (sIL-2R, 2957 U/ml); as such, he  
346 met the diagnostic criteria for haemophagocytic lymphohistiocytosis (HLH). One month later,  
347 a liver biopsy was taken but did not show any evidence of metabolic disease.

348 At the age of 11 months, further tests showed that the bone marrow cellularity was  
349 normal, with no evidence of natural killer cell dysfunction or cytotoxicity defects.

350 At the age of 13 months, the patient started to experience afebrile generalized seizures.  
351 He died at the age of 14 months from a severe H1N1 pneumonia infection with acute  
352 respiratory distress syndrome (ARDS) and cardiorespiratory failure.

353  
354

355 **Kindred 2. P2.1 and P2.2** were born to non-consanguineous parents of Caucasian  
356 origin. **P2.1** had an uneventful medical history including normal tolerance of MMR vaccination  
357 until the age of 4 years, when she presented with persistent microhematuria, microalbuminuria,  
358 pneumonia, and gastroenteritis. She was hospitalized with arterial hypertension, mild  
359 thrombocytopenia (123 G/L), proteinuria, hypochromic microcytic anemia, and elevated LDH  
360 levels (1050 U/L). A kidney biopsy showed thrombotic microangiopathy (TMA). An atypical  
361 hemolytic-uremic syndrome was diagnosed, and genetic testing revealed a homozygous  
362 deletion in *CFHR1/CFHR3*. Antihypertensive medication normalized the patient's blood  
363 pressure but her first morning urine remained positive for microhematuria (without proteinuria).

364 Between the age of 4 and 8 years, she had repeated hospitalizations (once per year,  
365 for a week) for episodes with high fever, pneumonia, lethargy, elevated transaminases. Since  
366 then, no other relevant infections or inflammatory states/diseases occurred, but she  
367 maintained persistent elevation of liver enzymes. At the age of 10, ultrasound showed a focal  
368 isoechogetic, homogeneous, hepatic lesion (1.7×1.4 cm) in segment IV. Nodular regenerative  
369 hyperplasia was diagnosed, following a liver biopsy.

370 At last follow-up, the patient was in a stable condition, with normal blood pressure,  
371 intermittent microalbuminuria, persistent microhematuria, and slightly elevated transaminases.

372

373 **P2.1's brother (P2.2)** was born with microcephaly and suffered from recurrent infections  
374 from the first week of life onward. At the age of 3 months, following rotavirus vaccination, he  
375 experienced an episode of respiratory syncytial virus (RSV) bronchitis, together with  
376 thrombocytopenia and increased transaminases. He recovered but was re-admitted 2 weeks  
377 later again for RSV bronchitis, thrombocytopenia, and elevated transaminases. At this time,  
378 elevated TSH was detected and thyroid hormone treatment was administered. Brain MRI was  
379 normal.

380 At the age of 4 months, the patient developed fever. A clinical examination detected  
381 hepatosplenomegaly, and abdominal ultrasound showed ascites. **P2.2** had pronounced  
382 thrombocytopenia (9 G/L), anemia (hemoglobin: 60 G/L), elevated transaminases (ASAT:

383 10521 U/L; ALAT: 2472 U/L), elevated LDH (13230 U/L), and a coagulation disorder  
384 (prothrombin 20%; prothrombin time (PTT): 68 sec; antithrombin <25%). Acute liver failure and  
385 influenza A virus infection were diagnosed. Despite intensive care, the patient's respiratory  
386 status deteriorated, and acute kidney failure occurred. The patient died of multi-organ failure.  
387

388  
389 **Kindred 3. P3.1 and P3.2** were born to consanguineous Syrian parents (cousins).  
390 Their three older siblings were in good health. **P3.1** had experienced recurrent seizures and  
391 thrombocytopenia in Syria. After a prolonged generalized seizure, cardiac arrest occurred, and  
392 she died at the age of 5 months.

393 At the age of 10 months, **P3.2** was admitted to hospital with fever and an upper  
394 respiratory tract infection. Laboratory work-up revealed thrombocytopenia (71 G/L), elevated  
395 transaminases (ASAT: 452 U/l; ALAT: 229 U/l) and elevated D-dimers (1619 µg/L). Lumbar  
396 puncture showed 6 cells/µl, an elevated protein level (385 mg/L), and normal lactate and  
397 glucose levels in the CSF. The patient was treated with antibiotics and his clinical situation  
398 improved.

399 One month later, he was re-admitted with suspected gastroenteritis, again associated  
400 with thrombocytopenia (70 G/L) and elevated transaminases (ASAT: 158 U/l; ALAT: 73 U/l).  
401 His clinical condition improved upon symptomatic treatment, and he was again discharged in  
402 relatively good health.

403 Two weeks later, P3.2 was treated with oral antibiotics for otitis media. His condition  
404 did not improve and he became somnolent. The boy was admitted to hospital, where acute  
405 hepatic cytolysis (ASAT: 10217 U/L; ALAT: 2420 U/L; LDH: 7590 U/L) and liver dysfunction  
406 (international normalized ratio: 1.14), petechiae, and encephalopathy were noted. Ultrasound  
407 showed an enlarged, hyperechogenic liver with nodular areas; these features were compatible  
408 with a diagnosis of progressive liver fibrosis. He experienced a tonic-clonic seizure after  
409 admission, and was transferred to a pediatric liver transplant center where he developed  
410 progressive multi-organ failure. Brain MRI revealing massive necrotizing encephalitis and  
411 leptomenigeal enhancement. Follow-up MRI showed edema of both thalami, and  
412 disseminated ischemia in the periventricular white matter, the corpus callosum, and right  
413 cerebellum. Respiratory insufficiency prompted intubation but the patient's respiratory status  
414 worsened, with tracheal bleeding. Acute renal failure prompted the initiation of continuous  
415 venous hemofiltration. A CT scan revealed perturbed kidney perfusion that was consistent with  
416 a diagnosis of shock kidney. Empiric antibiotic and antimycotic treatment was initiated. Due to  
417 a massive blood load of HHV-6, ganciclovir/foscarnet treatment was initiated. Norovirus was  
418 found in the stools. Immunological work-up showed the transient absence of NK cells, an  
419 elevated sIL-2R level (2122 U/mL), and hyperferritinemia (2204 µg/dl).

420 The patient died at the age of 12 months due to multi-organ failure in the context of a  
421 severe, systemic HHV-6 infection.  
422

423  
424 **Kindred 4. P4.1 and P4.2** were born to non-consanguineous parents of Caucasian  
425 origin. **P4.1** presented with seizures at the age of 7 months. She soon developed respiratory  
426 distress, and was admitted to hospital. Mechanical ventilation was required from day 2

427 onwards. Although the patient was not feverish, a clinical examination revealed  
428 hepatosplenomegaly and laboratory tests revealed anemia (hemoglobin: 67 g/l),  
429 thrombocytopenia (15 G/L), leukocytosis (white blood cell (WBC) count: 35.8 G/L, with a  
430 neutrophil left shift), elevated ferritin (4800 µg/L), elevated triglycerides (9.5 mmol/L), elevated  
431 ASAT (2500 U/L), hemophagocytosis (documented by a bone marrow aspirate), and CNS  
432 involvement (seizures, abnormal MRI findings, and elevated CSF protein levels (580 g/L)).  
433 Adenovirus DNA was detected in the patient's blood and nasopharyngeal aspirate and so  
434 cidofovir was initiated. Natural killer (NK) cell degranulation (as assessed by CD107a  
435 expression) was within the normal range, as was the perforin expression level, NK cell  
436 cytotoxicity, and sIL-2R level on day 3 post-admission. As the patient's clinical and laboratory  
437 profiles met the diagnostic criteria for HLH, treatment with dexamethasone, etoposide and  
438 cyclosporine was initiated (in line with the HLH2004 guidelines). Although the ferritin and  
439 triglyceride levels normalized, the patient remained dependent on platelet transfusions and  
440 then developed pulmonary hemorrhage with edema, ascites, and pleural effusions. Elevated  
441 creatinine levels, high blood pressure and left ventricular hypertrophy were also noted. A bone  
442 marrow aspirate collected on day 10 post-admission showed bone marrow aplasia without  
443 hemophagocytosis. On the same day, the patient's condition deteriorated in the context of  
444 *E.coli* sepsis. Despite the initiation of extracorporeal membrane oxygenation (ECMO), the  
445 patient died 24 hours later.

446  
447 **P4.2** (P4.1's brother) presented with cytopenia and hepatosplenomegaly at the age of  
448 9 months, in the context of symptoms of a viral upper respiratory infection. However, a viral  
449 pathogen was not identified. A bone marrow aspirate was normal, and the respiratory infection  
450 resolved spontaneously. At the age of 22 months, P4.2 developed hepatosplenomegaly and  
451 nephrotic syndrome; this resulted in respiratory compromise requiring high-flow oxygen  
452 supplementation. Adenovirus and parainfluenza viruses were detected in the nasopharyngeal  
453 aspirate. An ultrasound assessment of the liver revealed a non-specific, coarse echotexture.  
454 A liver biopsy revealed vasculopathic changes with evolving nodular regenerative hyperplasia.  
455 Even though the patient recovered from this episode (following treatment with corticosteroids),  
456 developmental regression was observed from the age of 22 months onwards. Brain MRI  
457 revealed multifocal white matter changes in both hemispheres of the brain (on T2 and fluid  
458 attenuation inversion recovery (FLAIR) sequences); this was suggestive of significant,  
459 multifocal gliosis. Although a diagnosis of HLH was considered at the time of the second  
460 episode (i.e. at the age of 22 months), the patient did not meet all the criteria. The patient also  
461 had hypertension and left ventricular hypertrophy. Natural killer cell degranulation (as  
462 assessed by CD107a expression) was within the normal range, as were perforin expression,  
463 lymphocyte subset counts and immunoglobulin (IgA/M/G) levels. In view of the sibling's death  
464 and the signs of possible immune dysregulation, the patient underwent hematopoietic stem  
465 cell transplantation (HSCT) with a fully matched unrelated donor. At last follow-up (5 years  
466 after transplantation), the patient was in good health and had not experienced further episodes  
467 of immune dysregulation. Brain MRI showed that the white matter changes had stabilized 6  
468 months after HSCT and had even regressed 5 years after HSCT. Although the patient has  
469 made developmental progress since the HSCT, he continues to show developmental delay  
470 and has been diagnosed with autism.



471                   **Kindred 5. P5.1 and P5.2** were born to non-consanguineous parents of  
472 Caucasian origin. At the age of almost 3 months, **P5.1** presented with fever, respiratory  
473 distress, and mild thrombocytopenia. Within 3 days of admission, the patient's condition  
474 deteriorated; he developed acute respiratory distress syndrome, bicytopenia, and kidney and  
475 liver failure. A clinical examination revealed hepatomegaly but no splenomegaly. Laboratory  
476 tests showed anemia (hemoglobin 75 g/l), thrombocytopenia (54 G/L), leukocytosis (WBC  
477 count: 43.7 G/L, neutrophilic granulocytes (20.1 G/L with a neutrophil left shift, lymphocyte  
478 count: 20.7 G/L), a coagulation disorder (PTT: 27% (normal values >70); INR: 2.82 (normal  
479 values <1.3); activated PTT: 93 s (normal values <50); factor V: 14% (normal values >60%);  
480 factor VII: 14%; (normal values >50); and fibrinogen: 0.78 g/l (in the normal range)), and  
481 elevated liver enzymes (ASAT: 13375 U/L; ALAT: 1456 U/L), LDH (18191 U/L), ferritin (81418  
482 µg/L) and sIL-2R (3185 pg/ml). Human herpesvirus type 6 (HHV6) and cytomegalovirus (CMV)  
483 DNA was detected in the patient's blood ( $8 \times 10^5$  copies/ml and  $2.4 \times 10^3$  copies/ml,  
484 respectively), and so treatment with ganciclovir was initiated. NK cell degranulation (as  
485 assessed by CD107a expression) was in the normal range. Perforin expression was in the  
486 lower normal range, and genetic tests subsequently revealed a heterozygous p.Ala91Val  
487 variant. This mutation was not considered relevant because it is common in the general  
488 population and was also detected in the healthy father. Due to severe circulatory failure that  
489 was refractory to conventional therapy, venous-arterial ECMO was initiated. As the patient's  
490 clinical and laboratory profile met the diagnostic criteria for HLH, corticosteroid treatment was  
491 initiated on day 2 post-admission. Given the presence of bicytopenia, elevated LDH, and  
492 kidney failure, we considered a diagnosis of thrombotic microangiopathy (TMA); however, only  
493 a few schistocytes were found in the blood smear. Following an initial improvement in the  
494 patient's condition, ECMO was withdrawn after 6 days but this was followed by pulmonary  
495 hemorrhage. Brain MRI showed severe hypoxic lesions in all parts of the brain, and an  
496 ultrasound assessment of the kidneys revealed hyperechogenic parenchyma. The patient  
497 remained anuric, with hemodialysis ruled out by the ongoing pulmonary hemorrhage.  
498 Treatment was withdrawn, and the patient died.

499  
500                   **P5.2** (P5.1's sister) presented with fever, respiratory distress, and mild  
501 thrombocytopenia at the age of 9 months. Laboratory tests revealed anemia (hemoglobin: 68  
502 g/l), thrombocytopenia (14 G/L), leukocytosis (WBC count: 36.7 G/L), elevated ferritin (4800  
503 µg/L), elevated triglycerides (5.5 mmol/L), elevated liver enzymes, low factor V (42%; normal  
504 range >60%), and normal albumin and ammonium levels. A CSF analysis gave normal values  
505 for protein, glucose, and the cell count. Sapovirus, enterovirus and rhinovirus were detected  
506 in the nasopharyngeal aspirate, and HHV6 was the only detected virus by virome analysis (see  
507 material and methods) in the patient's blood; treatment with ganciclovir was therefore initiated.  
508 Overall, the patient's clinical and laboratory profiles met the diagnostic criteria for HLH, and  
509 treatment (dexamethasone, etoposide and cyclosporine) was initiated in line with the HLH2004  
510 protocol. NK cell degranulation (as assessed by CD107a expression) was in the normal range.  
511 Perforin expression was abnormally low, and genetic tests subsequently revealed a  
512 heterozygous p.Ala91Val variant (as in the patient's brother). A liver biopsy showed  
513 hepatocellular necrosis. Bleeding and hemorrhagic shock developed after the liver biopsy, so  
514 the patient was transferred to a pediatric intensive care unit at a university medical center.

515 Kidney failure with anuria occurred on day 5 after the patient's initial presentation, and was  
516 treated with dialysis. Cyclosporine treatment was withdrawn, since the drug's possible causal  
517 role in kidney failure could not be ruled out. Laboratory tests highlighted the presence of  
518 schistocytes. No haptoglobin was detected. The plasma complement SC5b9 level was  
519 elevated (671 ng/ml), whereas levels of C3c, C4, ADAMST13, and factors H, B, and I were  
520 within the normal range. No anti-factor H antibodies were detected. A kidney biopsy (performed  
521 one month after the initial presentation) revealed TMA, and so treatment with anti-complement  
522 C5 antibody (eculizumab) was initiated. A kidney biopsy led to bleeding and hemorrhagic  
523 shock. During continued treatment with etoposide and lower doses of dexamethasone, a  
524 second HLH flare occurred one month after the initial presentation. The flare had probably  
525 been triggered by a bacterial infection (*S. epidermidis*), which led to sepsis in the context of  
526 etoposide-induced neutropenia. Treatment with anti-thymocyte globulin was initiated, and  
527 partial remission of the HLH was achieved. In order to prevent further HLH episodes, treatment  
528 with the JAK1/JAK2 inhibitor ruxolitinib was initiated. Two months after the patient's initial  
529 presentation, gastrointestinal bleeding was observed. Endoscopy evidenced a large number  
530 of small ulcers in the duodenum and throughout the colon. The histopathologic assessment  
531 was not conclusive. The dose of dexamethasone was progressively reduced, and the drug  
532 was eventually withdrawn in view of the gastrointestinal TMA and possible steroid-induced  
533 gastrointestinal bleeding. Treatment with eculizumab and ruxolitinib was maintained.

534 Three months after the initial presentation, the patient developed tachypnea (initially  
535 due to hydrothorax during peritoneal dialysis) requiring oxygen therapy. Despite the resolution  
536 of hydrothorax and the absence of any signs of infection, the patient continued to require  
537 oxygen.

538 In the following months, the patient experienced repeated episodes of fever and  
539 developed signs of subclinical HLH. Given the lack of a known etiology and therefore the  
540 uncertain prognosis for kidney transplantation, combination of the latter with HSCT was not  
541 considered to be a viable option. Peritoneal dialysis was initiated, and the patient was  
542 discharged to home (almost 5 months after the initial presentation) with oxygen therapy. Two  
543 weeks after discharge, the patient presented with respiratory distress and mechanical  
544 ventilation was initiated. Pulmonary hemorrhage was diagnosed, and she succumbed to her  
545 illness at the age of 16 months.

546  
547 **Kindred 6.** The male patient **P6.1** was born to consanguineous parents of Egyptian  
548 origin. At the age of 48 months, P6.1 presented with nephrotic nephritic syndrome (heavy  
549 proteinuria, elevated creatinine, and hematuria). The patient did not respond to steroid  
550 treatment or various immunosuppressants (cyclophosphamide, cyclosporine, and  
551 mycophenolate mofetil). At the age of 6 years, a kidney biopsy showed features of  
552 membranoproliferative glomerulonephritis. Out of the 15 glomeruli per section, one was  
553 sclerotic, four showed mesangial hypercellularity with increased mesangial matrix, and 4 were  
554 segmentally sclerotic. The remaining glomeruli and the non-sclerotic elements showed a  
555 thickening of the basement membrane. A few atrophic tubules were detected but there was no  
556 interstitial fibrosis. The blood vessels were unremarkable. The only extrarenal sign or  
557 symptoms were hepatosplenomegaly, anemia and low platelets. The frequency of infections  
558 during childhood was reportedly normal. At the age of 9 years (while on mycophenolate

559 mofetil), P6.1 developed severe sepsis with an unknown focus. The sepsis did not respond to  
560 triple antibiotic therapy and progressed to ARDS and death.

561

562 **Kindred 7. P7.1** was born to consanguineous parents of Native American descent. Her  
563 first major episode of illness occurred at 5 months old, with fever, extremity rash, anorexia,  
564 lethargy, and rapidly progressive respiratory failure. She was found to have pneumonia on a  
565 chest X-ray, and a blood culture was positive for group A *Streptococcus*. The patient had  
566 leukocytosis (WBC count: 50 x G/L), thrombocytopenia (42 G/L), anemia, elevated liver  
567 enzymes (both ASAT and ALAT: 9000 U/L), hyperferritinemia (12000 µg/L), rhabdomyolysis,  
568 splenomegaly, acute kidney injury, ARDS, and low B-cell and NK cell counts. Her condition  
569 was diagnosed as toxic shock syndrome with sepsis and multi-organ failure, from which she  
570 had recovered completely after 3 weeks.

571 The patient was in good health between 6 and 11 months of age, with slightly delayed  
572 but steady developmental gains. However, at 12 months of age, she presented with fever,  
573 cough, and rhinorrhea after having received the  
574 diphtheria/tetanus/pertussis/polio/Haemophilus influenzae type b, measles/mumps/rubella  
575 and meningitis C vaccines. Over the following week, she developed respiratory failure with  
576 leukocytosis (WBC count >50 x 10<sup>9</sup>/L), anemia (hemoglobin: 75 g/L), thrombocytopenia (20  
577 G/L), elevated transaminases (ASAT: 281 U/L, ALAT: 108 U/L), hyperferritinemia (2300 µg/L)  
578 and elevated C-reactive protein (70 mg/L). She was admitted to the intensive care unit, with  
579 multi-organ dysfunction characterized by ARDS, bicytopenia, elevated transaminases,  
580 hepatomegaly, splenomegaly, rhabdomyolysis, and rash. An extensive work-up for infectious  
581 diseases detected vaccine strain measles virus (in a PCR test of a nasopharyngeal aspirate),  
582 anti-measles virus IgM, and Epstein-Barr virus (EBV, PCR blood test: 6.6 x 10<sup>2</sup> copies/mL). A  
583 bone marrow aspirate showed hypercellularity and a few hemophagocytes. A liver biopsy  
584 revealed non-specific inflammation, and the liver tissue stained negative for EBV, CMV, and  
585 herpes simplex virus. The patient was treated with ribavirin, vitamin A, methylprednisone, and  
586 a single bolus of intravenous immunoglobulins (IVIG). She left the intensive care unit after six  
587 weeks.

588 At 33 months of age, the patient presented with severe ARDS, bicytopenia,  
589 leukocytosis, elevated transaminases, hyperferritinemia (2546 µg/L), splenomegaly, acute  
590 kidney injury, and a new, profound, neurologic injury with seizure activity. Brain MRI showed  
591 extensive, symmetric, restricted diffusion involving both cerebral hemispheres and the  
592 cerebellum, together with dural enhancement. The patient tested positive for influenza B and  
593 for *Staphylococcus aureus* in an endotracheal tube culture. She was treated with oseltamivir  
594 and antibiotics. She received high-dose IVIG and (due to suspected HLH) high-dose  
595 dexamethasone. HSCT was considered but not pursued because of the patient's severe  
596 neurologic impairments. At present the patient is alive and being treated with an antiepileptic  
597 and a monthly dose of IVIG.

598

599 **Kindred 8. P8.1** was born to consanguineous parents of Turkish descent. At the age  
600 of 2 months, the girl developed severe CMV infection with hepatic disease, lung disease and  
601 inflammatory changes in the brain stem. Notably, there was no evidence of retinal disease or  
602 hearing loss. The infection had presumably been transmitted through the CMV +ve breast milk,

603 as CMV DNA was absent in a dried blood spot from the perinatal card. She was treated with  
604 ganciclovir and oral valganciclovir throughout the 1<sup>st</sup> year of life. CMV was never again  
605 detected in the subsequent course neither in plasma nor tissue biopsies (brain, liver, lung),  
606 while CMV antibodies of IgG isotype remained at unusually high levels. The affected organs,  
607 however, did not recover. Nodular changes occurred in the liver as evidenced by ultrasound  
608 and liver enzymes never returned to normal levels. Lung imaging showed persistent interstitial  
609 lung disease beginning in the first year of life and multiple subpleural cysts consistent with lung  
610 fibrosis. While she had chronic dry cough throughout her life, she never required oxygen  
611 supplementation. Multiple inflammatory and calcifying lesions developed in the brain. From  
612 birth, she showed poor development with failure to thrive, small stature and mental retardation.

613 At 4 years, the patient presented with nephritic nephrotic kidney disease due to  
614 thrombotic microangiopathy, moderately responding to steroids. From the age of 5 years on,  
615 the patient has been suffering from chronic recurrent arthritis of the knees with joint effusions  
616 and from erythema nodosum. She received regular prednisolone pulse therapy. With  
617 progressive vasculitis at multiple organ sites, addition of methotrexate, maintenance steroids,  
618 mycophenolate mofetil and everolimus could not prevent a continuous deterioration that led to  
619 profound pancytopenia, highly active inflammation and vasculitis (ferritin above 6,000 µg/l, von  
620 Willebrand antigen above 300%). HLH criteria (6/8) were fulfilled. With seizures, cerebral palsy  
621 and pulmonary hemorrhage requiring artificial ventilation, however, treatment was changed to  
622 palliative care. At age 8 years, she succumbed to her relentless disease.

623  
624 **P8.2 (P8.1's brother)** was diagnosed with a unilateral double-kidney with megaureter  
625 and urinary transport dysfunction II-III° on both sides. Also a congenital heart defect was  
626 discovered (haemodynamic irrelevant ASD II). During routine check-up in the second month  
627 of life, elevated transaminases, anemia and thrombocytopenia (both requiring transfusions),  
628 elevated inflammatory parameters (in the absence of fever), and failure to thrive were noted.  
629 Clinical improvement was achieved with pulse IV methylprednisolone and IL-1 blocking  
630 (anakinra) therapy. Nevertheless, interstitial lung disease developed requiring O2  
631 supplementation for a total of 4 month.

632 The patient was in good health between 6 and 15 months of age. However, at 15  
633 months of age, he presented with severe varicella after having received the varicella vaccine.

634 In the second year of life, an influenza A infection led to hospitalization and he required  
635 a prolonged course of oxygen supplementation. Neurologically a severe developmental delay  
636 was diagnosed, accompanied by autism spectrum disorder, which is treated with risperidone.  
637 At the age of 6,3 years, a second influenza A infection occurred and the patient was admitted  
638 to the intensive care unit, with respiratory insufficiency. A prolonged course of high-flow oxygen  
639 supplementation was needed. Due to HLH-like multisystem inflammatory disease with need of  
640 erythrocyte transfusion, another course of pulse IV methylprednisolone therapy was initiated  
641 and led to improvement.

642 Currently, at age 7,5, the patient is alive and well without any medication but  
643 risperidone. A mediastinal lymphadenopathy is currently under investigations concerning  
644 mycobacteria (skin test highly positive, IGRA negative).

645  
646  
647

#### 4. SUPPLEMENTARY TABLES

**Supplementary Table 1. Details on inflammatory episodes and organ involvement in patients with ZNFX1-deficiency and affected siblings**

| ID    | Gender | Age         | Infectious agent           | Hematopoietic                    | Liver disease                                                | Neurology                                                                               | Kidney disease                                                       | Lung disease                         | Other                                                | Immunosuppression                | Transplant | Outcome       |
|-------|--------|-------------|----------------------------|----------------------------------|--------------------------------------------------------------|-----------------------------------------------------------------------------------------|----------------------------------------------------------------------|--------------------------------------|------------------------------------------------------|----------------------------------|------------|---------------|
| P1.1  | F      | At birth:   | unknown                    | NA                               | hepatitis                                                    | No                                                                                      | No                                                                   | No                                   | Failure to thrive (since birth)                      | NA                               | No         | NA            |
|       |        | 6 mo:       | unknown                    | Anemia, lymphadenopathy          | hepatomegaly                                                 | No                                                                                      | No                                                                   | Recurrent pneumonia                  |                                                      | NA                               | No         | Dead (2y 8mo) |
| P1.2* | F      | 6 mo:       | unknown                    | No                               | elevated liver enzymes                                       | seizures                                                                                |                                                                      | severe chronic lung disease          |                                                      |                                  |            |               |
|       |        | 9 mo:       | tuberculin conversion      | No                               | hepatomegaly                                                 |                                                                                         |                                                                      |                                      |                                                      |                                  |            |               |
|       |        | 1y          | None                       | splenomegaly                     |                                                              |                                                                                         |                                                                      |                                      |                                                      |                                  |            |               |
|       |        | 6mo:        | None                       |                                  |                                                              |                                                                                         |                                                                      |                                      |                                                      |                                  |            |               |
|       |        | 3 y:        | Influenza A                |                                  |                                                              |                                                                                         |                                                                      | cholesterol pneumonitis              | polyarthritis                                        | Steroids, MTX, Aza**             |            |               |
|       |        | 7 y:        |                            |                                  |                                                              |                                                                                         |                                                                      | Pneumonia, restrictive lung function |                                                      |                                  |            |               |
|       |        | 10-15 y:    | RSV, Adenovirus            |                                  |                                                              | white matter changes (11y), multiple focal calcifications (14y)                         | Glomerulosclerosis, tubular atrophy, interstitial fibrosis (autopsy) |                                      |                                                      |                                  | Lung (10y) | Dead (15y)    |
| P1.3  | M      | Birth-2 mo: | None                       | low plts (2 mo)                  | jaundice (at birth)                                          | multiple focal calcifications (2 mo)                                                    |                                                                      |                                      | tetralogy of Fallot, failure to thrive (since birth) |                                  |            |               |
|       |        | 5 mo        | RTI, germ unknown          | splenomegaly                     | hepatomegaly                                                 |                                                                                         |                                                                      | Interstitial lung disease            |                                                      | Steroids, Aza                    |            |               |
|       |        | 6 mo        | Rota- and Norovirus        | HLH                              | hepatomegaly, elevated liver enzymes, coagulopathy           |                                                                                         |                                                                      |                                      | Intestinal invagination                              |                                  |            |               |
|       |        | 1y          | Influenza A                | No                               |                                                              | seizures                                                                                |                                                                      |                                      | ARDS                                                 |                                  |            | Dead (1y 2mo) |
| P2.1  | F      | 4 y:        | unknown                    | (Anemia, low plts during TMA, 4) |                                                              | No                                                                                      | aHUS, TMA                                                            | pneumonia                            | gastroenteritis                                      |                                  |            |               |
|       |        | 9-14 y:     |                            |                                  | Elevated liver enzymes, nodular regenerative hyperplasia (9) |                                                                                         |                                                                      |                                      |                                                      |                                  |            | Alive (14)    |
| P2.2  | M      | At birth:   |                            |                                  |                                                              | Microcephaly (since birth)                                                              |                                                                      |                                      |                                                      |                                  |            |               |
|       |        | 2 mo:       | RSV, Rotavirus vaccine (?) | Anemia, low plts                 | Elevated liver enzymes                                       |                                                                                         |                                                                      | Bronchitis                           |                                                      |                                  |            |               |
|       |        | 2.5 mo:     | RSV                        | Anemia, low plts                 | Elevated liver enzymes                                       |                                                                                         |                                                                      | Bronchitis                           | Hypothyroidism                                       |                                  |            |               |
|       |        | 3 mo:       | Influenza A                | HLH-like                         | Acute liver failure, hepatomegaly                            |                                                                                         | Kidney failure during MOF                                            | ARDS                                 |                                                      |                                  |            | Dead (3 mo)   |
| P3.1  | F      | Birth-5 mo: | NA                         | Low plts                         | NA                                                           | Seizures (NA)                                                                           | NA                                                                   | NA                                   |                                                      | NA                               | No         | Dead (5 mo)   |
| P3.2  | M      | 10 mo:      | RTI, germ unknown          | HLH-like                         | Elevated liver enzymes                                       | No                                                                                      | No                                                                   | No                                   | No                                                   | No                               | No         |               |
|       |        | 11 mo:      | Norovirus                  | HLH-like                         | Elevated liver enzymes, hepatomegaly                         | No                                                                                      | No                                                                   | No                                   | No                                                   | No                               | No         |               |
|       |        | 1 y:        | HHV6                       | HLH-like                         | Acute liver failure                                          | Hepatic encephalopathy, seizures, leptomenigeal enhancement, necrotizing encephalopathy | Kidney failure during MOF                                            | ARDS, pulmonary hemorrhage           | No                                                   | No                               | No         | Dead (1 y)    |
| P4.1  | F      | 7-8 mo:     | ADV (7 mo)                 | HLH (7 mo)                       | Elevated liver enzymes, hepatomegaly (7 mo)                  | Seizures, leptomenigeal enhancement, ischemic lesions (7 mo)                            | Kidney failure during MOF (8 mo)                                     | ARDS, pulmonary hemorrhage (8 mo)    |                                                      | Steroids, IVIG, VP16, CSA (7 mo) | no         | Dead (8 mo)   |

648

## (Suppl. Table 1 continued)

| ID      | Gender | Age                       | Infectious agent                                                                                                               | Hematopoietic                                                            | Liver disease                                                           | Neurology                                                                                       | Kidney disease                                      | Lung disease                                                                                  | Other                                      | Immunosuppression                                                                       | Transplant | Outcome             |
|---------|--------|---------------------------|--------------------------------------------------------------------------------------------------------------------------------|--------------------------------------------------------------------------|-------------------------------------------------------------------------|-------------------------------------------------------------------------------------------------|-----------------------------------------------------|-----------------------------------------------------------------------------------------------|--------------------------------------------|-----------------------------------------------------------------------------------------|------------|---------------------|
| P4.2    | M      | 9 mo:                     | RTI, germ unknown                                                                                                              | splenomegaly                                                             | hepatomegaly                                                            | no                                                                                              | no                                                  | no                                                                                            | no                                         | no                                                                                      | no         |                     |
|         |        | 1y 10mo                   | ADV,<br>Parainfluenza                                                                                                          | HLH-like                                                                 | Hepatomegaly,<br>nodular regenerative<br>hyperplasia                    | Developmental<br>regression, white<br>matter changes (1.8)                                      | Nephrotic<br>syndrome (1.8)                         | no                                                                                            | no                                         | Steroids (1.8)                                                                          | no         |                     |
|         |        | 1y11mo-<br>8y             |                                                                                                                                |                                                                          |                                                                         |                                                                                                 |                                                     |                                                                                               |                                            | HSCT<br>(2y 2mo)                                                                        |            | Alive (8)           |
| P5.1    | M      | 2-3 mo:                   | HHV6 (+CMV) (2 mo)                                                                                                             | HLH<br>(2 mo)                                                            | Acute liver failure,<br>hepatomegaly<br>(2 mo)                          | Hypoxic ischemia<br>during MOF (3 mo)                                                           | Kidney failure<br>during MOF (3<br>mo)              | ARDS,<br>pulmonary<br>hemorrhage<br>(3 mo)                                                    |                                            | Steroids, IVIG (2-3<br>mo)                                                              | No         | Dead<br>(3 mo)      |
| P5.2    | F      | 9 mo -<br>1y 4 mo:        | HHV6 (+Sapovirus,<br>Rhinovirus)                                                                                               | HLH<br>(9 mo)                                                            | Elevated liver<br>enzymes,<br>hepatomegaly,<br>coagulopathy (9 mo)      | No                                                                                              | TMA (9 mo)                                          | Suspected<br>Interstitial<br>lung disease<br>(10 mo),<br>pulmonary<br>hemorrhage<br>(1y 4 mo) |                                            | Steroids, IVIG,<br>VP16, CSA (9 mo)<br>ATG,<br>Eculizumab, (10 mo)<br>Ruxolitinib (1 y) | No         | Dead<br>(1y 4mo)    |
| P6.1    | M      | Birth-9<br>y:             | No infection<br>suspected                                                                                                      | Anemia, low plts,<br>splenomegaly                                        | Hepatomegaly                                                            |                                                                                                 |                                                     |                                                                                               |                                            |                                                                                         |            |                     |
|         |        | 4-6 y:                    | No infection<br>suspected                                                                                                      |                                                                          |                                                                         |                                                                                                 |                                                     | Nephrotic<br>syndrome (4 y),<br>MPGN (6 y)                                                    |                                            | Steroids (4 y), CP,<br>CSA, MMF (NA)                                                    | No         |                     |
|         |        | 9 y                       | Sepsis, germ not<br>identified                                                                                                 |                                                                          | NA                                                                      | NA                                                                                              |                                                     | ARDS                                                                                          |                                            |                                                                                         |            | Dead<br>(9 y)       |
| P7.1    | F      | 5 mo:                     | GroupA<br>Streptococcus                                                                                                        | HLH-like                                                                 | Elevated liver<br>enzymes,<br>hepatomegaly                              | No                                                                                              | Acute kidney<br>injury                              | ARDS                                                                                          |                                            |                                                                                         |            |                     |
|         |        | 1 y:                      | Vacc strain measles<br>(+EBV)                                                                                                  | HLH                                                                      | Elevated liver<br>enzymes,<br>hepatomegaly                              | No                                                                                              | No                                                  | ARDS,<br>pulmonary<br>hemorrhage                                                              |                                            | Steroids, IVIG                                                                          |            |                     |
|         |        | 2y 9mo:                   | Influenza B,<br>S. aureus                                                                                                      | HLH-like                                                                 | Elevated liver<br>enzymes                                               | Seizures, extensive<br>restricted diffusion,<br>ischemic lesions<br>developmental<br>regression | Acute kidney<br>injury                              | ARDS                                                                                          |                                            | Steroids, IVIG<br>(2y 9mo)                                                              |            | Alive<br>(3 y)      |
| P8.1    | F      | 2 mo                      | CMV                                                                                                                            |                                                                          | Liver disease:<br>hepatomegaly,<br>elevated enzymes,<br>nodular changes | Disseminated<br>inflammatory lesions,<br>calcifications in white<br>matter, seizures            |                                                     | Interstitial<br>lung disease<br>with fibrosis                                                 |                                            |                                                                                         |            |                     |
|         |        | 4 y:                      |                                                                                                                                |                                                                          |                                                                         | developmental<br>regression                                                                     | TMA nephritic<br>nephrotic<br>syndrome              | Erythema nodosum                                                                              |                                            |                                                                                         |            |                     |
|         |        | 6-8 y:                    | Unknown trigger                                                                                                                | HLH                                                                      |                                                                         | Seizures, cerebral<br>palsy<br>severe<br>developmental delay                                    |                                                     | Pulmonary<br>hemorrhage<br>Oxygen<br>support<br>(2-6 mo)                                      | ASD II<br>Duplex kidney and<br>megaurether | Steroids, MTX,<br>MMF, everolimus<br>Steroids, anakinra                                 | No         | Dead<br>(8 y)       |
| P8.2    | M      | 2 mo:                     | Unknown trigger                                                                                                                | HLH-like                                                                 | Elevated liver<br>enzymes                                               |                                                                                                 |                                                     |                                                                                               |                                            |                                                                                         |            |                     |
|         |        | 1y 3mo:                   | Vacc strain VZV                                                                                                                | Severe varicella (not further<br>specified)                              | NA                                                                      | NA                                                                                              | NA                                                  | NA                                                                                            |                                            | NA                                                                                      |            |                     |
|         |        | 2 y:                      | Influenza A                                                                                                                    |                                                                          |                                                                         | Autism spectrum<br>disorder                                                                     |                                                     | Prolonged<br>oxygen<br>support                                                                |                                            |                                                                                         |            |                     |
|         |        | 6 y:                      | Influenza A                                                                                                                    | HLH-like                                                                 |                                                                         |                                                                                                 |                                                     | Prolonged<br>oxygen<br>support                                                                |                                            | Steroids                                                                                |            | Alive<br>(7 y)      |
| Summary |        | female<br>to male:<br>8:7 | Number of severe viral<br>infections by<br>(-)ssRNA viruses: 10<br>(+)ssRNA viruses: 2<br>dsRNA viruses: 1<br>dsDNA viruses: 7 | Episodes triggered by<br>infections:<br>HLH: 6<br>HLH-like: 9<br>ARDS: 8 |                                                                         | Neurological involvement in<br>n= 11 patients                                                   | Nephrological<br>involvement<br>in<br>n=11 patients | Pulmonary<br>involvement in<br>n= 13 patients                                                 |                                            | Limited success with<br>immunosuppressive therapy<br>HSCT arrested disease in n=1       |            | Alive:dead:<br>4:11 |

650 *Table S1: Clinical phenotypes. In bold: virally triggered disease. Numbers in brackets denote age in years. ADV: adenovirus; ATG: anti-thymoglobulin; CSA:*  
651 *cyclosporine A; (CMV): low copy number of cytomegalovirus in blood by PCR; CP: cyclophosphamide; (EBV): low copy number of Epstein Barr virus in blood by*  
652 *PCR; HLH: hemophagocytic lymphohistiocytosis; HHV6: human herpesvirus type 6; HSCT: hematopoietic stem cell transplant; Infl: influenza; IVIG: intravenous*  
653 *immunoglobulins; MMF: mycophenolate mofetil; MTX: methotrexate; NA: information not available; Parainfl: human parainfluenza virus; RTI: respiratory tract*  
654 *infection; VP16: etoposide;*  
655 *\*Treatment: only immunosuppressive and immunomodulatory treatments before transplants are indicated here*  
656 *\*\*For P1.2: infections after lung transplant are not mentioned in this table.*

657  
658  
659  
660  
661  
662  
663  
664  
665  
666  
667  
668  
669  
670  
671  
672  
673  
674  
675  
676  
677  
678  
679  
680  
681  
682  
683  
684  
685

686 **Supplementary Table 2: Live vaccine side effects**

| Patient ID | Live vaccine (age)                                 | Temporarily associated clinical problems                        | Side effect after live vaccine: relationship between clinical problem and live vaccine |          |            |
|------------|----------------------------------------------------|-----------------------------------------------------------------|----------------------------------------------------------------------------------------|----------|------------|
|            |                                                    |                                                                 | None                                                                                   | Unlikely | Definitely |
| P1.1       | NA                                                 |                                                                 |                                                                                        |          |            |
| P1.2       | MMR (1)                                            | None                                                            | X                                                                                      |          |            |
| P1.3       | NA                                                 |                                                                 |                                                                                        |          |            |
| P2.1       | MMR<br>VZV (1)                                     | None                                                            | X                                                                                      |          |            |
| P2.2       | Rotavirus (0.2)                                    | RSV and Influenza A infection, liver failure, ARDS, death (0.3) |                                                                                        | X        |            |
| P3.1       | None                                               |                                                                 |                                                                                        |          |            |
| P3.2       | MMR (1)                                            | HHV6, HLH-like disease, multi-organ failure (1)                 |                                                                                        | X        |            |
| P4.1       | NA                                                 |                                                                 |                                                                                        |          |            |
| P4.2       | NA                                                 |                                                                 |                                                                                        |          |            |
| P5.1       | None                                               |                                                                 |                                                                                        |          |            |
| P5.2       | None                                               |                                                                 |                                                                                        |          |            |
| P6.1       | BCG (0.2)<br>MMR (1.3)<br>OPV (0.2; 0.3; 0.5; 1.5) | None                                                            | X                                                                                      |          |            |
| P7.1       | MMR (1)                                            | Vaccine strain measles and low-level EBV viremia, HLH and ARDS  |                                                                                        |          | X          |
| P8.1       | MMR (1)                                            |                                                                 | X                                                                                      |          |            |
| P8.2       | MMR<br>VZV (1.3)                                   | Vaccine strain varicella                                        |                                                                                        |          | X          |

687 *Table S2: Live-attenuated vaccines and adverse reactions. Only temporally associated clinical events are listed (<1 month after live vaccine administration).*  
688 *None: no clinical events during the month following live vaccine; unlikely: although temporally associated clinical events, other cause possible; Definitely:*  
689 *temporal relationship, no other cause evident, detection of vaccine strain in body fluids or organ tissue (measles) or typical rash (VZV);*  
690 *ARDS: acute respiratory distress syndrome; HHV6: human herpesvirus type 6; HLH: hemophagocytic lymphohistiocytosis; MMR: measles, mumps, and rubella;*  
691 *RSV: respiratory syncytial virus; VZV: varicella zoster virus.*



692  
693

**Supplementary Table 3: Diagnostic Criteria for Pediatric Acute Liver Failure**

| Patient ID | Hepatomegaly | ASAT (UI/L, max.) | ALAT (UI/L, max.) | Coagulopathy | INR (max.) | Bilirubin total (umol/L, max.) | Bilirubin conjugated (umol/L, max.) | GGT (U/L, max.) | Albumin (g/L, min.) | LDH (UI/L, max.)    | Hepatic encephalopathy | PALF criteria fulfilled: |
|------------|--------------|-------------------|-------------------|--------------|------------|--------------------------------|-------------------------------------|-----------------|---------------------|---------------------|------------------------|--------------------------|
| P1.1       | Yes          | elevated          | elevated          | NA           | NA         | NA                             | NA                                  | NA              | NA                  | NA                  | No                     | unknown                  |
| P1.2       | Yes          | 118               | 151               | No           | 1.2        | 6.8                            | NA                                  | 302             | 34                  | 1626                | No                     | No                       |
| P1.3       | Yes          | 3184              | 918               | Yes          | 1.4        | 17.1                           | NA                                  | 566             | 15.6                | 4674                | No                     | No                       |
| P2.1       | No           | elevated          | elevated          | NA           | NA         | NA                             | NA                                  | NA              | NA                  | increased (age 4 y) | No                     | unknown                  |
| P2.2       | Yes          | 10521             | 2472              | Yes          | 2.7        | 159.0                          | 97                                  | 49              | 22.8                | 17735               | No                     | Yes                      |
| P3.1       | NA           | NA                | NA                | NA           | NA         | NA                             | NA                                  | NA              | NA                  | NA                  | NA                     | unknown                  |
| P3.2       | Yes          | 10217             | 2420              | Yes          | 1.5        | 41.0                           | 24                                  | 117             | 18                  | 11476               | Yes                    | Yes                      |
| P4.1       | Yes          | 2910              | 751               | NA           | NA         | NA                             | NA                                  | NA              | NA                  | NA                  | No                     | unknown                  |
| P4.2       | Yes          | 83                | 64                | NA           | NA         | NA                             | NA                                  | NA              | NA                  | NA                  | NA                     | unknown                  |
| P5.1       | Yes          | 13375             | 2350              | Yes          | 2.9        | 77.0                           | 48                                  | 146             | 17                  | 9209                | possible               | Yes                      |
| P5.2       | Yes          | 161               | 253               | Yes          | 1.2        | 19.0                           | 5                                   | 352             | 33                  | 2499                | No                     | No                       |
| P6.1       | Yes          | elevated          | elevated          | NA           | NA         | NA                             | NA                                  | NA              | 18                  | NA                  | NA                     | unknown                  |
| P7.1       | Yes          | 9000s             | 9000s             | No           | 1.2        | 12.0                           | 7                                   | 423             | 15                  | 1569                | No                     | No                       |
| P8.1       | Yes          | 400               | 629               | Yes          | 1.5        | 16.0                           | NA                                  | 800             | 28                  | 1065                | No                     | No                       |
| P8.2       | Yes          | 482               | 280               | Yes          | 1.4        | 9.0                            | NA                                  | 228             | NA                  | 1355                | No                     | No                       |

694 Table S3: Diagnostic criteria for Pediatric acute liver failure, according to the criteria of the PALF study group (Squires et al.)(1); NA: not available; PALF:  
695 Pediatric acute liver failure; y: years; ASAT: Aspartate transaminase; ALAT: Alanine transaminase; INR: International normalized ratio; GCT: Gamma-glutamyl  
696 transferase; PALF: Pediatric acute liver failure.

697  
698  
699  
700  
701  
702  
703  
704  
705

## Supplementary Table 4: Demographic and Genetic Characteristics of Patients

| Pat. ID | Gender | Consanguinity | Ethnic Origin / country of origin | Genomic Location Chr20 (GRCh37)     | Variant cDNA (NM_021035.2)          | Amino acid change (NP_066363.1)          | Exon number | Impact                  | CADD Score (phred) | PROVEAN Score  | Polyphen-2 Score | SIFT Score | gnomAD allele frequency | VarCards D:A Score | VarCards Extreme | Functional Domain                                                |                                                     |
|---------|--------|---------------|-----------------------------------|-------------------------------------|-------------------------------------|------------------------------------------|-------------|-------------------------|--------------------|----------------|------------------|------------|-------------------------|--------------------|------------------|------------------------------------------------------------------|-----------------------------------------------------|
| P1.1    | F      | Yes           | Arabian                           | NA                                  | NA                                  | NA                                       | NA          | NA                      | NA                 | NA             | NA               | NA         | NA                      | NA                 | NA               | NA                                                               |                                                     |
| P1.2    | F      | Yes           | Arabian                           | g.[47887853T>TA]; [47887853T>TA]    | c.[495_496insT]; [495_496insT]      | p.(Thr166TyrfsTer17); (Thr166TyrfsTer17) | 3 / 14      | Frameshift/ Framshift   | 25.4 / 25.4        | - / -          | - / -            | - / -      | Absent / Absent         | - / -              | - / -            | ARM repeat                                                       |                                                     |
| P1.3    | M      | Yes           | Arabian                           | g.[47887853T>TA]; [47887853T>TA]    | c.[495_496insT]; [495_496insT]      | p.(Thr166TyrfsTer17); (Thr166TyrfsTer17) | 3 / 14      | Frameshift/ Framshift   | 25.4 / 25.4        | - / -          | - / -            | - / -      | Absent / Absent         | - / -              | - / -            | ARM repeat                                                       |                                                     |
| P2.1    | F      | No            | Europe                            | g.[47872450C>CA]; [47886725TGA>T]   | c.[2698_2699insT]; [1623_1624delTC] | p.(Arg900MetfsTer5); (His542CysfsTer41)  | 9 / 14      | Frameshift/ Frameshift  | 28.8 / 24.1        | - / -          | - / -            | - / -      | Absent / Absent         | - / -              | - / -            | P-loop containing nucleoside triphosphate hydrolase / ARM repeat |                                                     |
| P2.2    | M      | No            | Europe                            | g.[47872450C>CA]; [47886725TGA>T]   | c.[2698_2699insT]; [1623_1624delTC] | p.(Arg900MetfsTer5); (His542CysfsTer41)  | 9 / 14      | Frameshift/ Frameshift  | 28.8 / 24.1        | - / -          | - / -            | - / -      | Absent / Absent         | - / -              | - / -            | P-loop containing nucleoside triphosphate hydrolase / ARM repeat |                                                     |
| P3.1    | F      | Yes           | Syria                             | NA                                  | NA                                  | NA                                       | NA          | NA                      | NA                 | NA             | NA               | NA         | NA                      | NA                 | NA               | NA                                                               |                                                     |
| P3.2    | M      | Yes           | Syria                             | g.[47887952T>A]; [47887952T>A]      | c.[397A>T]; [397A>T]                | p.(Lys133Ter); (Lys133Ter)               | 9 / 14      | Nonsense/ Nonsense      | 34 / 34            | - / -          | - / -            | - / -      | Absent / Absent         | 10:12 / 10:12      | Yes / Yes        | - / -                                                            |                                                     |
| P4.1    | F      | No            | Europe                            | g.[47866100A>G]; [47865686C>G]      | c.[3461T>C]; [3875G>C]              | p.(Ile1154Thr); (Cys1292Ser)             | 14 / 14     | Missense/ Missense      | 25.1 / 25.4        | -4.48 / 9.33   | - / -            | PD/ PD     | D/D                     | Absent / Absent    | 23:23 / 23:23    | Yes / Yes                                                        | P-loop containing nucleoside triphosphate hydrolase |
| P4.2    | M      | No            | Europe                            | g.[47866100A>G]; [47865686C>G]      | c.[3461T>C]; [3875G>C]              | p.(Ile1154Thr); (Cys1292Ser)             | 14 / 14     | Missense/ Missense      | 25.1 / 25.4        | -4.48 / 9.33   | - / -            | PD/ PD     | D/D                     | Absent / Absent    | 23:23 / 23:23    | Yes / Yes                                                        | P-loop containing nucleoside triphosphate hydrolase |
| P5.1    | M      | No            | Turkey                            | g.[47865770C>G]; [478684378TTCTC>T] | c[3791G>C] [5179_5183delGAG AA]     | p.(Cys1264Ser); (Glu1727LysfsTer11)      | 14 / 14     | Missense/ FrameShift    | 29.3 / -           | -9.36 / -      | D / -            | D / -      | Absent / 1.22e-05       | 23:23 / -          | Yes / -          | - / -                                                            |                                                     |
| P5.2    | F      | No            | Turkey                            | g.[47865770C>G]; [478684378TTCTC>T] | c[3791G>C]; [5179_5183delGAG AA]    | p.(Cys1264Ser); (Glu1727LysfsTer11)      | 14 / 14     | Missense/ FrameShift    | 29.3 / -           | -9.36 / -      | D / -            | D / -      | Absent / 1.22e-05       | 23:23 / -          | Yes / -          | - / -                                                            |                                                     |
| P6.1    | M      | Yes           | Egypt                             | g.[47887219C>T]; [47887219C>T]      | c.[1130G>A]; [1130G>A]              | p.(Arg377Gln); (Arg377Gln)               | 3 / 14      | Missense/ Missense      | 27.9 / 27.9        | -3.34 / 3.34   | - / -            | PD/ PD     | D/D                     | Absent / Absent    | 23:23 / 23:23    | Yes / Yes                                                        | ARM repeat / ARM repeat                             |
| P7.1    | F      | Yes           | Oji-Cree                          | g.[47887219C>T]; [47887219C>T]      | c.[3152T>C]; [3152T>C]              | p.(Leu1051Pro); (Leu1051Pro)             | 12/ 14      | Missense/ Missense      | 34                 | -6.128 / 6.128 | - / -            | PD/ PD     | D/D                     | Absent / Absent    | 22:23 / 22:23    | Yes / Yes                                                        | P-loop containing nucleoside triphosphate hydrolase |
| P8.1    | F      | Yes           | Turkey                            | g.[47887348del]; [47887348del]      | c.[1001del]; [1001del]              | p.(Arg334Glnfs*67); (Arg334Glnfs*67)     | 3/ 14       | FrameShift / FrameShift | - / -              | - / -          | - / -            | - / -      | Absent / Absent         | - / -              | - / -            | ARM repeat / ARM repeat                                          |                                                     |
| P8.2    | M      | Yes           | Turkey                            | g.[47887348del]; [47887348del]      | c.[1001del]; [1001del]              | p.(Arg334Glnfs*67); (Arg334Glnfs*67)     | 3/ 14       | FrameShift / FrameShift | - / -              | - / -          | - / -            | - / -      | Absent / Absent         | - / -              | - / -            | ARM repeat / ARM repeat                                          |                                                     |

Table S4. Demographic and genetic characteristics of patients. All mutations were exonic, CADD: Combined Annotation Dependent Depletion (tool for scoring the deleteriousness of single nucleotide variants as well as insertion/deletions variants in the human genome); Comp. HET: compound heterozygous mutations; D: damaging; F: female; gnomAD: genome Aggregation Database (from an international coalition of investigators with the goal of aggregating and harmonizing both exome and genome sequencing data from a wide variety of large-scale sequencing projects); HOM: homozygous mutations; M: male; NA: not available; NM: Reference sequence category for mRNA; NP: Reference sequence category for protein; PD: probably damaging; Polyphen-2: Polymorphism Phenotyping v2 (tool which predicts possible impact of an amino acid substitution on the structure and function of a human protein); PROVEAN: Protein Variation Effect Analyzer (software tool which predicts whether an amino acid substitution or indel has an impact on the biological function of a protein); SIFT: Sorting Intolerant From Tolerant (score predicts whether an amino acid substitution affects protein function based on sequence homology and the physical properties of amino acids).

707  
708  
709  
710  
711  
712  
713

714 **5. SUPPLEMENTARY FIGURES**

715 **Supplementary Figure 1:**

716

717 **A**

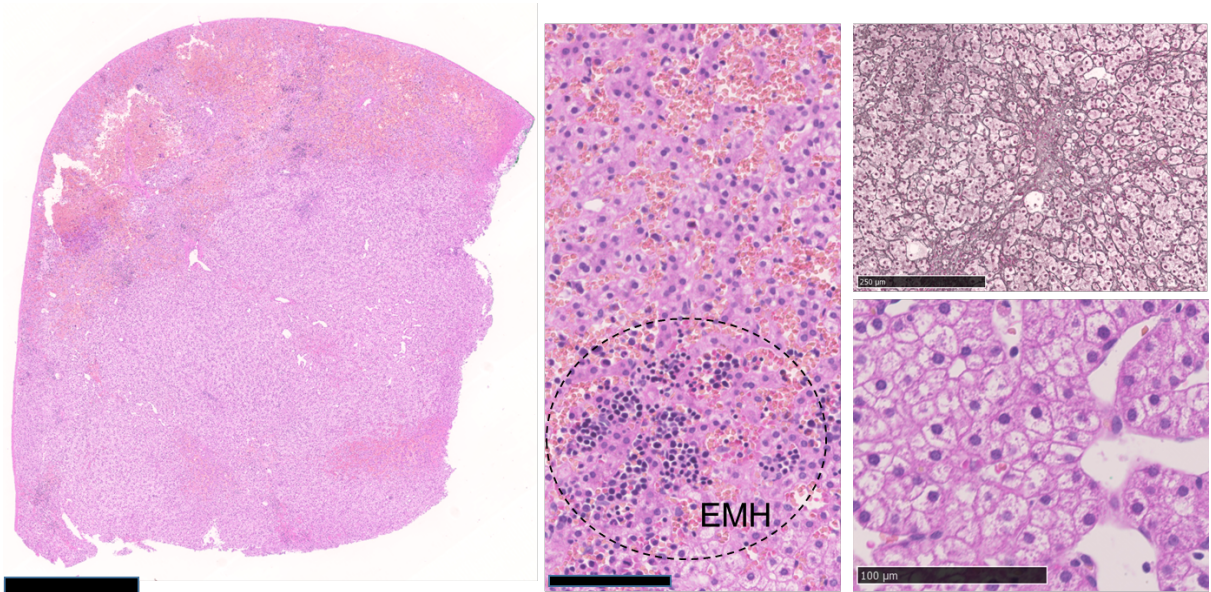

718

719

720

721 **B**

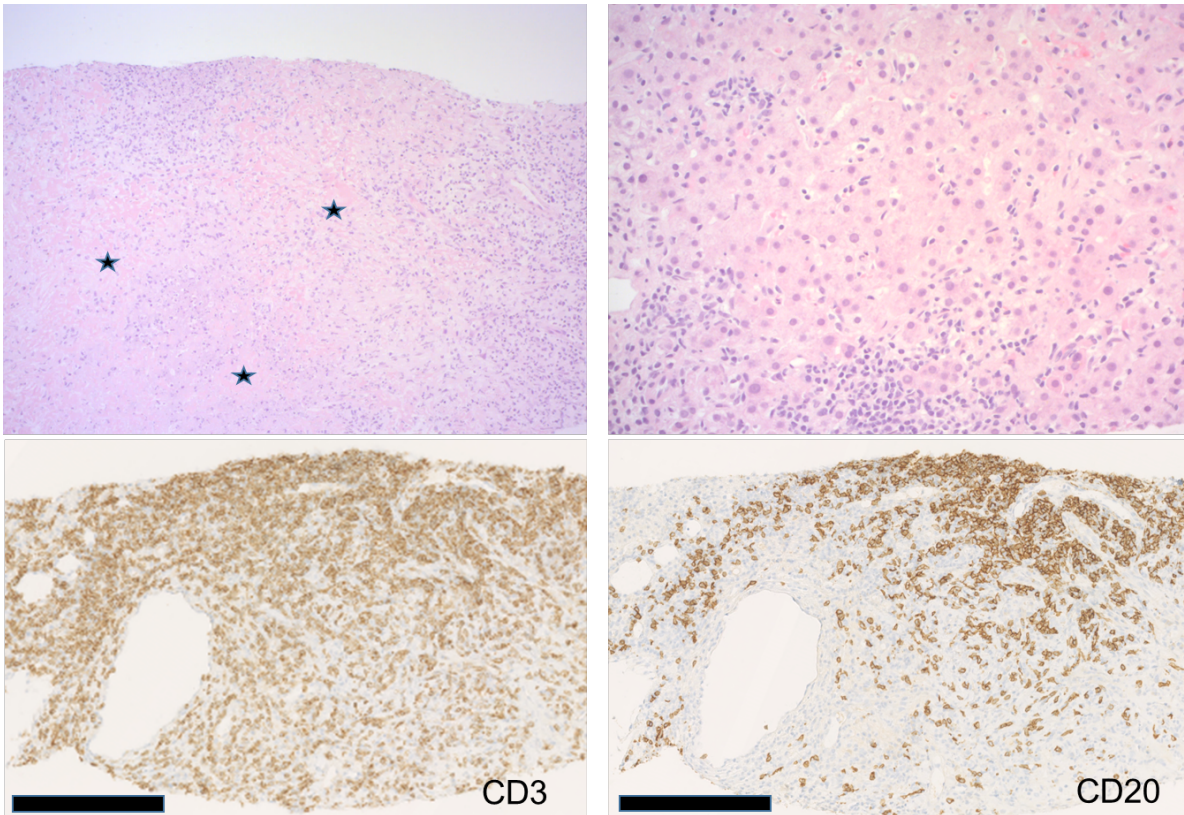

722

723

724



725

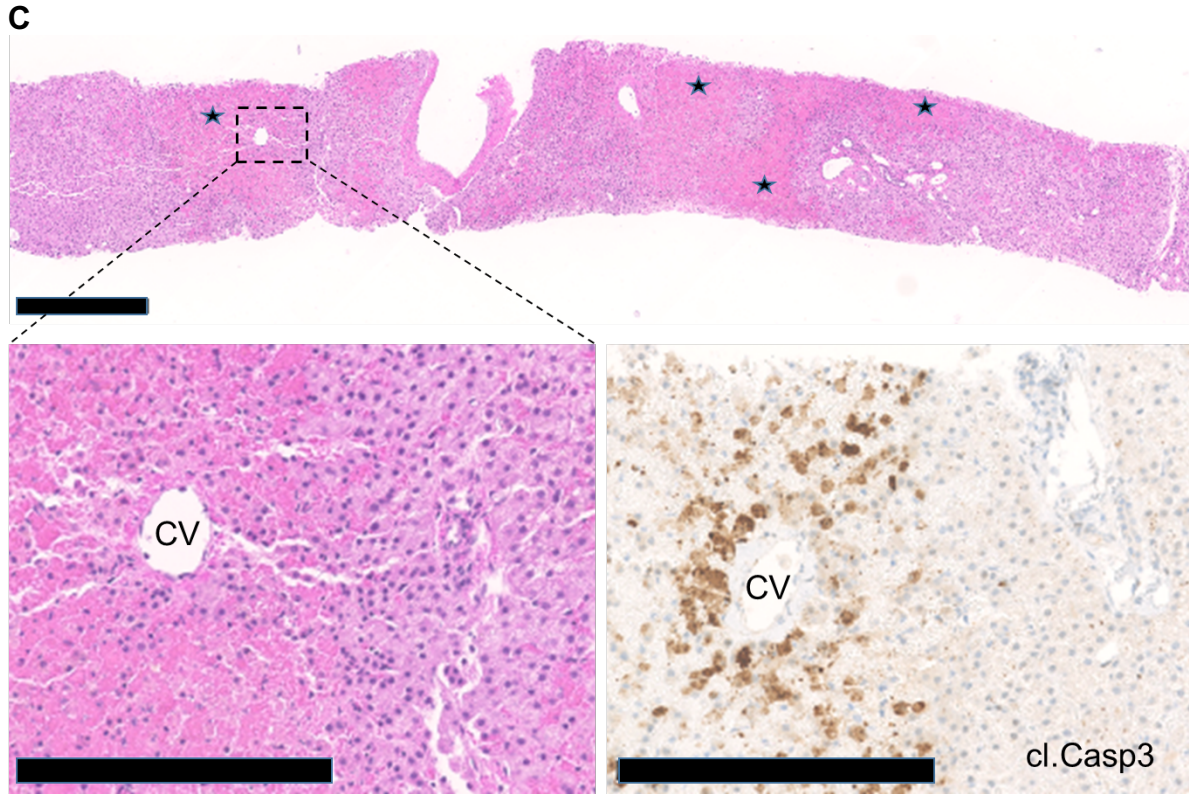

726

727

728

729

730

731

732

733

734

735

736

737

738

739

740

741

742

743

744

745

**Fig S1: Spectrum of histopathologic changes in the liver. Panel A,** Liver biopsy of P1.3. Overview (left) displays subcapsular liver tissue. Detail view (middle) reveals sinusoidal ectasia filled with red blood cells and foci of extramedullary hematopoiesis (EMH), as well as mildly altered architecture with multifocally obliterated sinusoids (upper right, silver reticulin stain), and irregularly arranged plates of hepatocytes with bright cytoplasm (lower right). Scale bars: 500 mm top), 100 mm (lower left), 250 mm (lower right).

**Panel B,** Liver biopsy of P2.1. Upper panel: Overview (left) displays areas of widespread (panlobular) necrosis (asterisks) with collapse and red cell extravasation. Detail view (right) reveals viable areas with dense immune cell infiltrates rich in lymphocytes and plasma cells. Lower panel: Immunohistochemical analysis confirms a mixed immune cell infiltrate including CD3+ and CD20+ cells. Magnification, upper panel: 10x (left), 20x (right). Scale bars (lower panel): 250 mm.

**Panel C,** Liver biopsy of P5.2. Upper panel: Overview displays confluent hepatocyte death predominantly in centrilobular areas (asterisks). Lower panel: Detail view reveals hepatocyte death and red blood cell extravasation accentuated around the central veins (CV), sparing periportal areas (right side of image). Hepatocyte cell death highlighted by cleaved Caspase 3 (cl.Casp3) immunohistochemistry (same area, consecutive slide). Scale bars: 500 mm (upper panel), 250 mm (lower panel).

746  
747  
748  
749

**Supplementary Figure 2:**

**Panel 1**

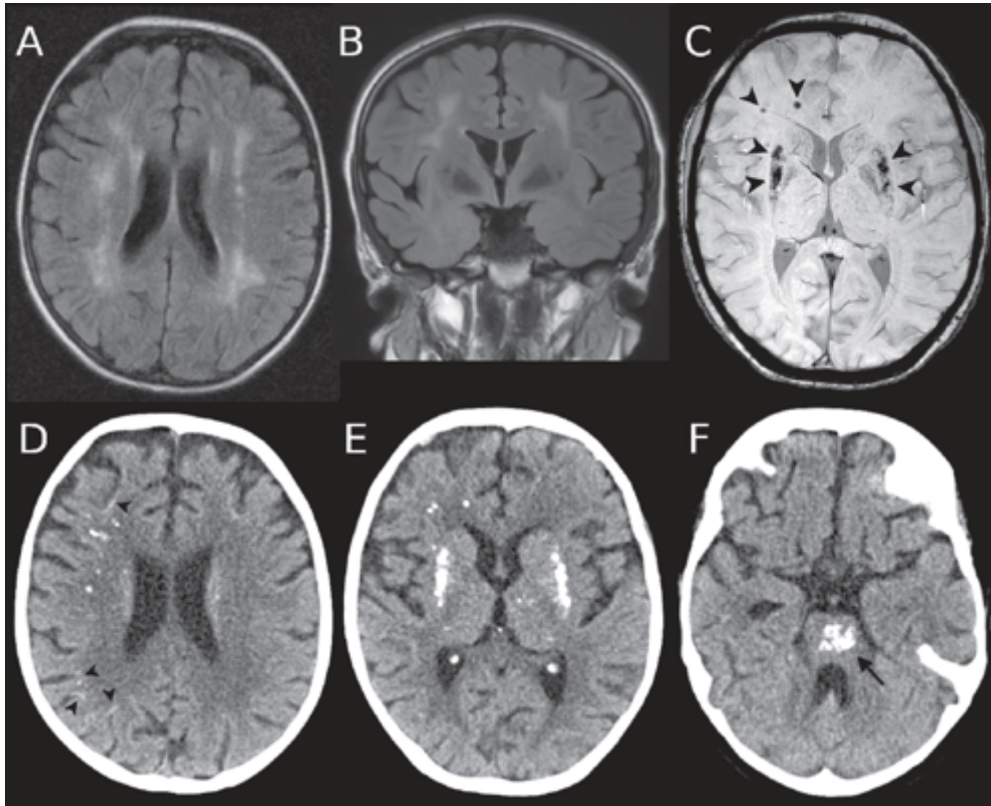

750  
751  
752

**Panel 2**

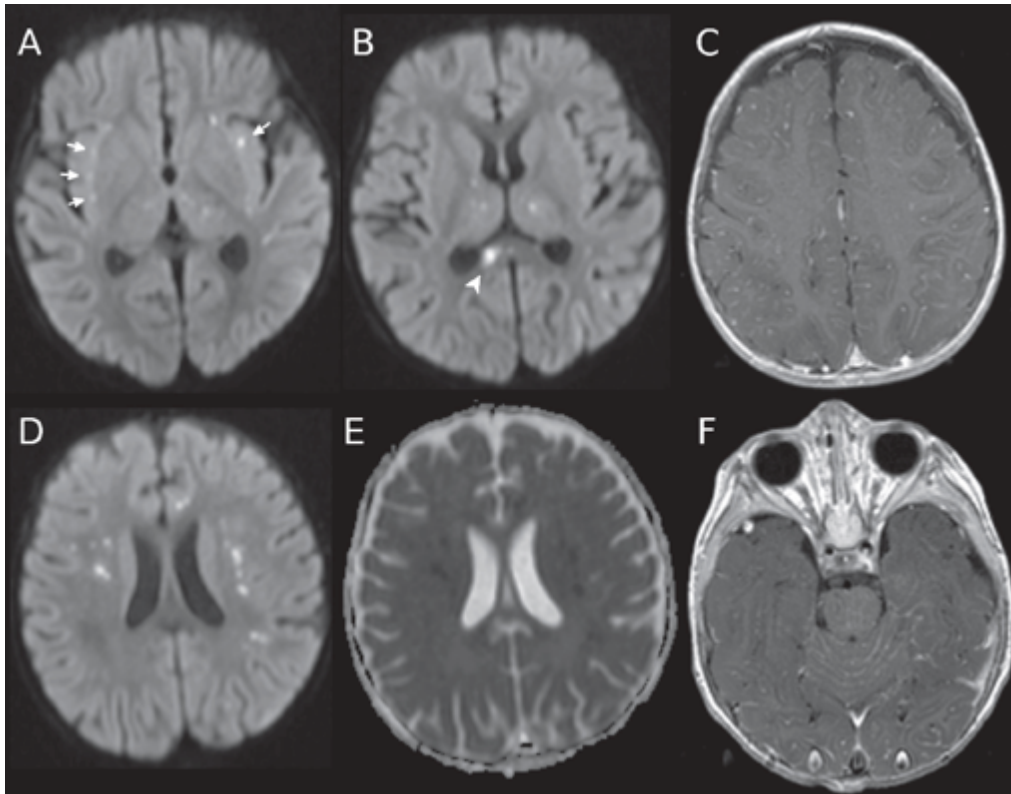

753  
754  
755



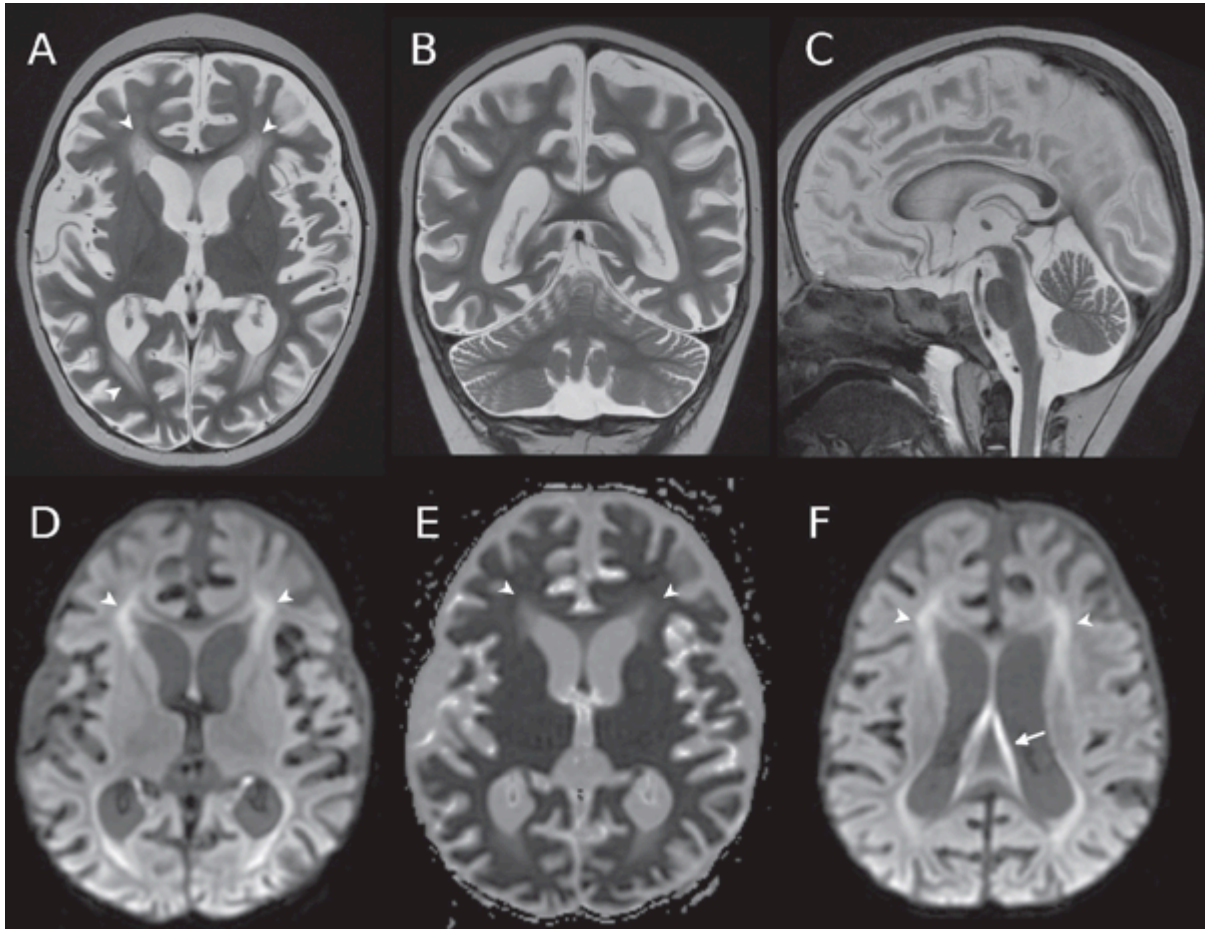

757  
758  
759  
760  
761  
762  
763  
764  
765  
766  
767  
768  
769  
770  
771  
772  
773  
774

**Fig S2: Brain MRI in patients with ZNF1 deficiency. Panel 1, P1.2.** White matter changes on an axial FLAIR image at the age of 11 years (A). The leukoencephalopathy had not progressed at the age of 14 (B). Calcification of the basal ganglia and white matter on susceptibility-weighted imaging at 14 years of age (arrowheads in C). Computed tomography at 15 years of age, showing calcification of the basal ganglia, thalami, white matter, cortex (arrowheads in D), and pons (arrow in F) (D, E, F). Mild atrophy. No cerebellar calcifications. **Panel 2, P3.2.** MRI at the age of 12 months. Multiple acute ischemic lesions on diffusion-weighted imaging, in white matter (A,D,E), splenium (arrowhead in B), thalami (A,B), external capsules and insula (arrows in A) in both hemispheres. Diffuse leptomeningeal enhancement suggestive of HLH on contrast-enhanced T1-weighted images (C, F). **Panel 3, P5.2,** MRI at the age of 13 months. T2-weighted images (A, B, C) and diffusion-weighted images (D,E,F) with an apparent diffusion coefficient map (E). Marked supratentorial atrophy (A, B). Periventricular T2 hyperintensity, which was especially prominent around the anterior and posterior horns of the lateral ventricles (arrowheads in A), with some restricted diffusion (arrowheads in D, E, F). T2 hyperintensity on the undersurface of the corpus callosum (C). T2 hyperintensity in the fornices (body and crura), with intensity on diffusion-weighted images (arrow in F).

775 **Supplementary Figure 3:**

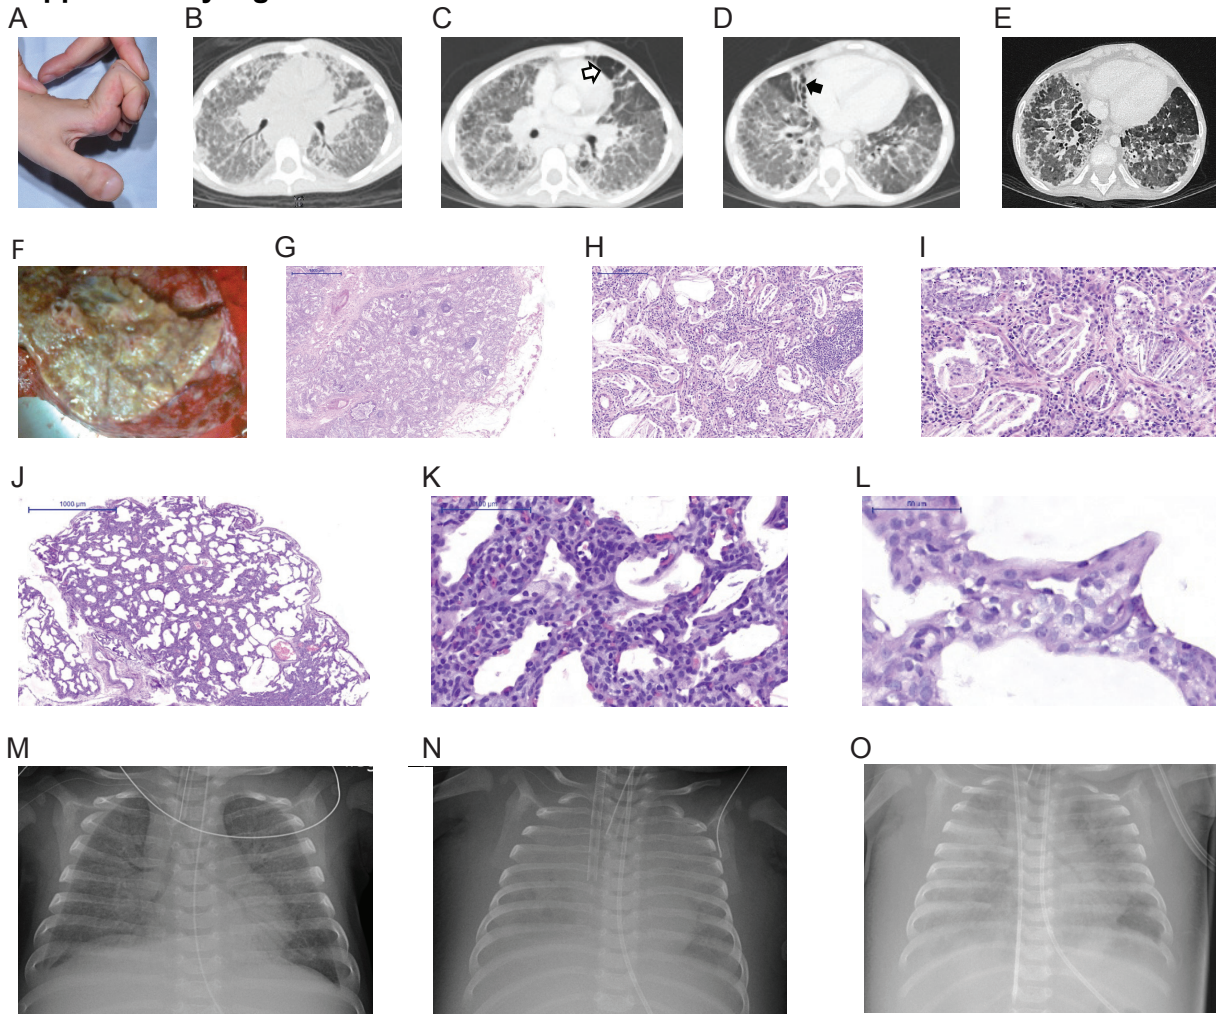

776  
777  
778  
779  
780  
781  
782  
783  
784  
785  
786  
787  
788  
789  
790  
791  
792  
793  
794  
795  
796  
797  
798

**Fig S3: Lung disease caused by ZNFX1 deficiency.** Patient P1.2 (**Panel A**) at the age of 10 years, with severe clubbing, joint hypermobility, and chronic joint pain. (**Panel B**) A CT scan at the age of 7 years, showing diffuse ground glass, septal thickening, consolidation, and hilar lymphadenopathy. (**Panels C to E**) At the age of 10 years, we observed more pronounced interseptal thickening, cyst formation (open arrow), and traction bronchiectasis (closed arrow). (**Panel F**) A lung explant was hard and yellow. (**Panels G to I**) Features consistent with cholesterol pneumonitis: (**Panel G**) Overview of the lung tissue with multiple cholesterol granulomas and foam cells in airspaces, with a moderate chronic interstitial inflammatory infiltrate and follicular hyperplasia, hematoxylin and eosin stain (H&E) x20; (**Panel H**) Cholesterol granulomas and foam cells in airspaces. An interstitial inflammatory infiltrate, dominated by lymphocytes and plasma cells, H&E x100; (**Panel I**) Cholesterol granulomas and foam cells in airspaces. An interstitial inflammatory infiltrate, dominated by lymphocytes and plasma cells, H&E x200. Patient P1.3 (**Panel J**) A lung biopsy at the age of 1 year, with irregularly expanded airspaces and widened alveolar septa (H&E x20). (**Panel K**) Hypercellular alveolar septa expanded by mesenchymal cells and resembling pulmonary interstitial glycogenosis. There were few intraalveolar foam cells (arrow), no significant interstitial inflammatory infiltrate, and no cholesterol clefts, H&E x200. (**Panel L**) Oval cells with vacuolated, periodic acid-Schiff (PAS)-negative cytoplasm, PAS x400. Patient P5.1 (**Panel M**) Lung X-ray at presentation (aged 3 months), with fine reticular ground glass opacification. (**Panel N**) 4 days later, the lung was almost completely opaque, and (**Panel O**) another 2 days later (the last X-ray before death) with some air entry on the left side and in the upper lobes. Note the massive edema of the skin.



799  
800  
801

**Supplementary Figure 4:**

A

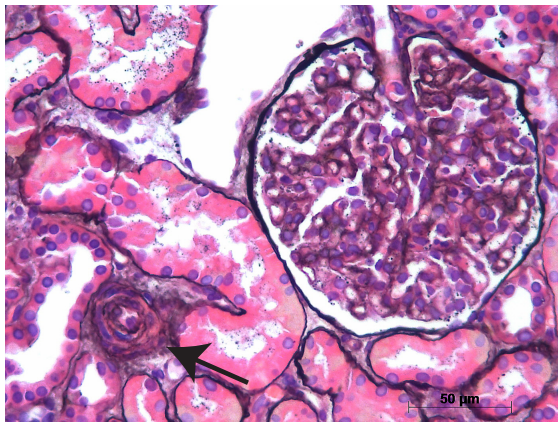

B

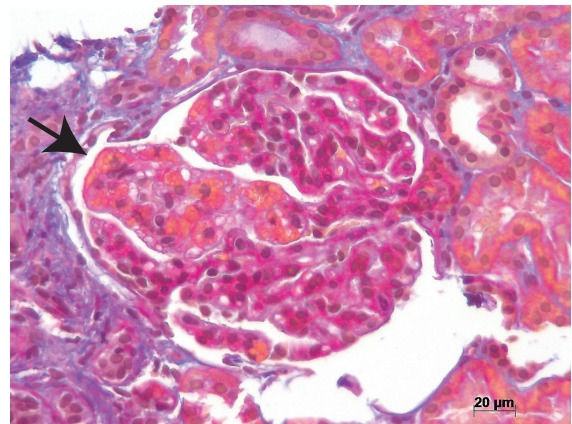

C

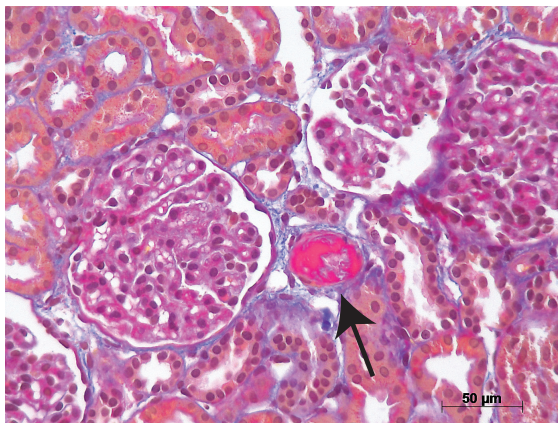

D

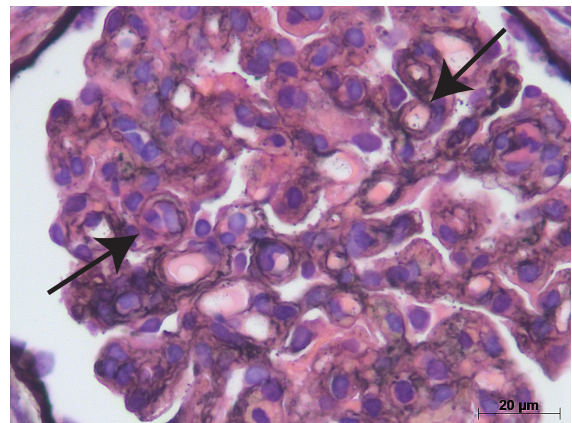

802  
803  
804  
805  
806  
807  
808  
809

**Fig S4: Thrombotic microangiopathy, with acute and chronic lesions. Panel A**, thrombosis in a hilar arteriole (arrow). **Panel B**, a glomerulus with prominent segmental mesangiolysis (arrow). **Panel C**, arrow indicating an arteriole with an “onion skin” pattern. **Panel D**, extensive glomerular basement membrane remodeling, with thickening and duplication. Panels A and B: trichrome staining, original magnification 200x for Panel A and 400x for Panel B. Panels C and D: PAS staining, original magnification 200x for Panel C and 640x for Panel D; scale bar: 50 μm (except in panel B: 20 μm).



810 **Supplementary Figure 5:**  
811  
812  
813

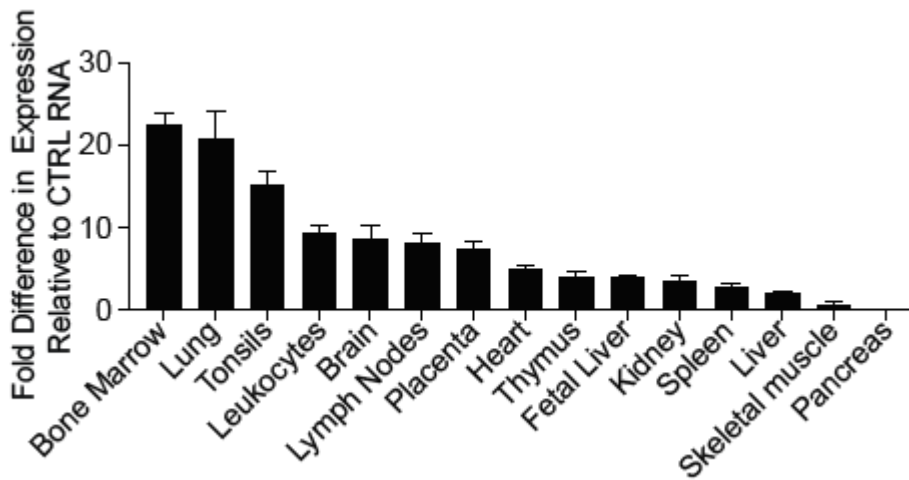

814 **Fig S5: ZNF1 is ubiquitously expressed but predominantly in the hematopoietic system.** Tissue  
815 expression of ZNF1, as detected by a qPCR analysis of organ-specific RNA libraries from  
816 multiple donors. The relative ZNF1 mRNA level in each organ was calculated relative to a  
817 control RNA library and standardized against 18S RNA expression. Columns and error bars  
818 represent the means and standard deviations of quadruplicate measurements.  
819  
820

821 **Supplementary Figure 6:**

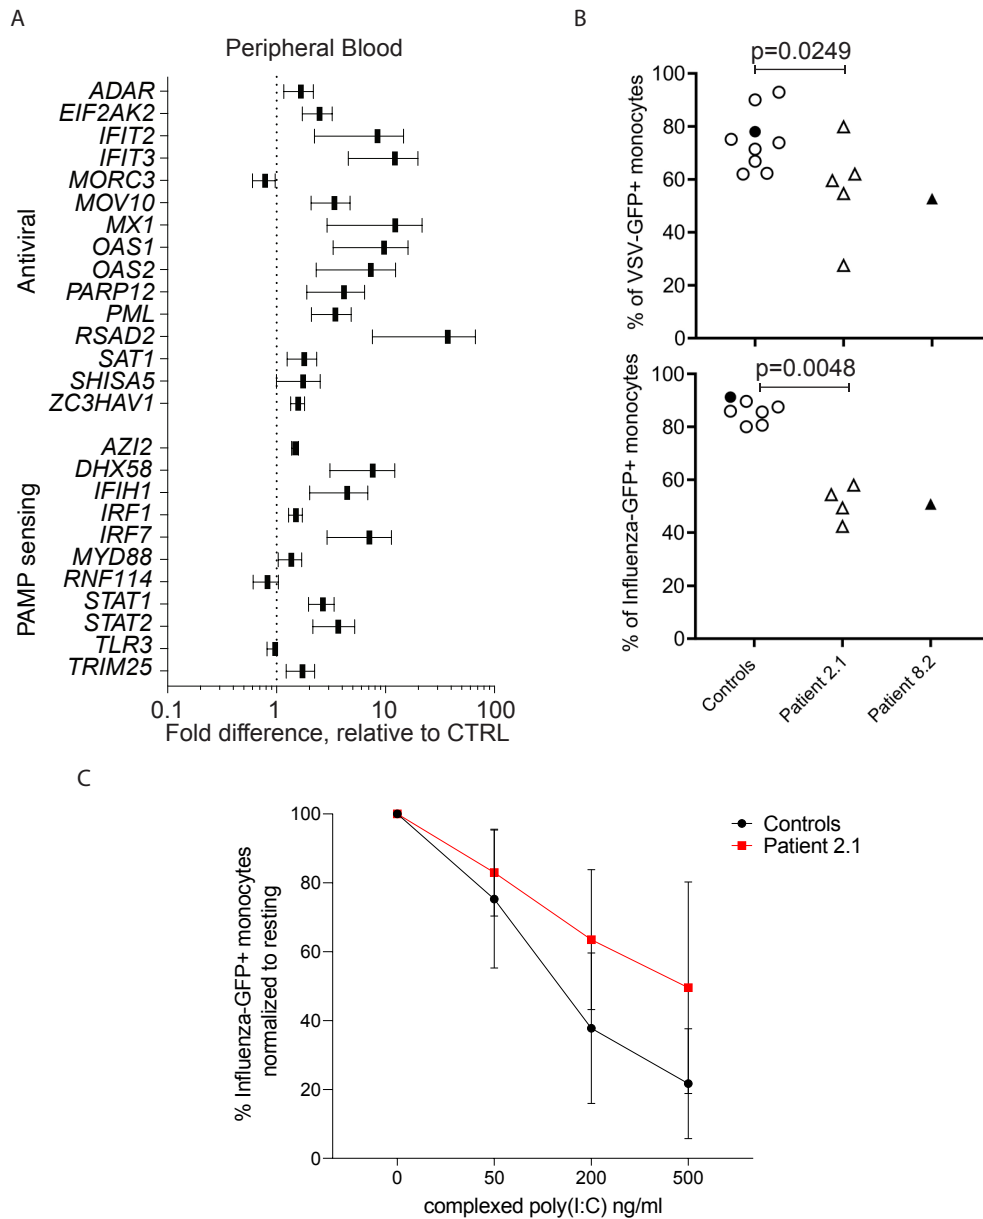

822  
823  
824  
825  
826  
827  
828  
829  
830  
831  
832  
833  
834  
835  
836  
837  
838

**Fig S6: Higher basal ISG expression and lower basal infection rate in ZNFX1 deficiency. Panel A:** Transcriptomic analysis of the level of expression of representative ISGs with antiviral and PAMP functions in PBMCs from P1.2 (two samples) and P2.1 (1 samples). Black boxes represent the mean fold difference vs. healthy controls. Error bars show the standard error of the mean for the three samples. **Panel B:** Percentage of VSV-GFP positive monocytes measured by FACS. PBMCs from patient 2.1, 8.2 (triangle symbols) and healthy controls (circle symbols) were infected with VSV-GFP (upper) or Influenza-GFP (lower) for 5 h. One single experiment is shown for patient 8.2 and its respective control (black triangle and black circle symbols). pValues were calculated using Man-Whitney U test, One-tailed. **Panel C:** Flow cytometry analysis of monocytes from Patient 2.1 and healthy control (Controls) pre-treated for 12 hours with different concentrations of lyovec-poly(I:C) and subsequently infected with Influenza-GFP virus. Mean percentage of VSV-GFP positive monocytes relative to the unstimulated condition (no lyovec-poly(I:C)) for four repeats. Error bars refer to  $\pm$  SD, n=4.

839 **Supplementary Figure 7:**

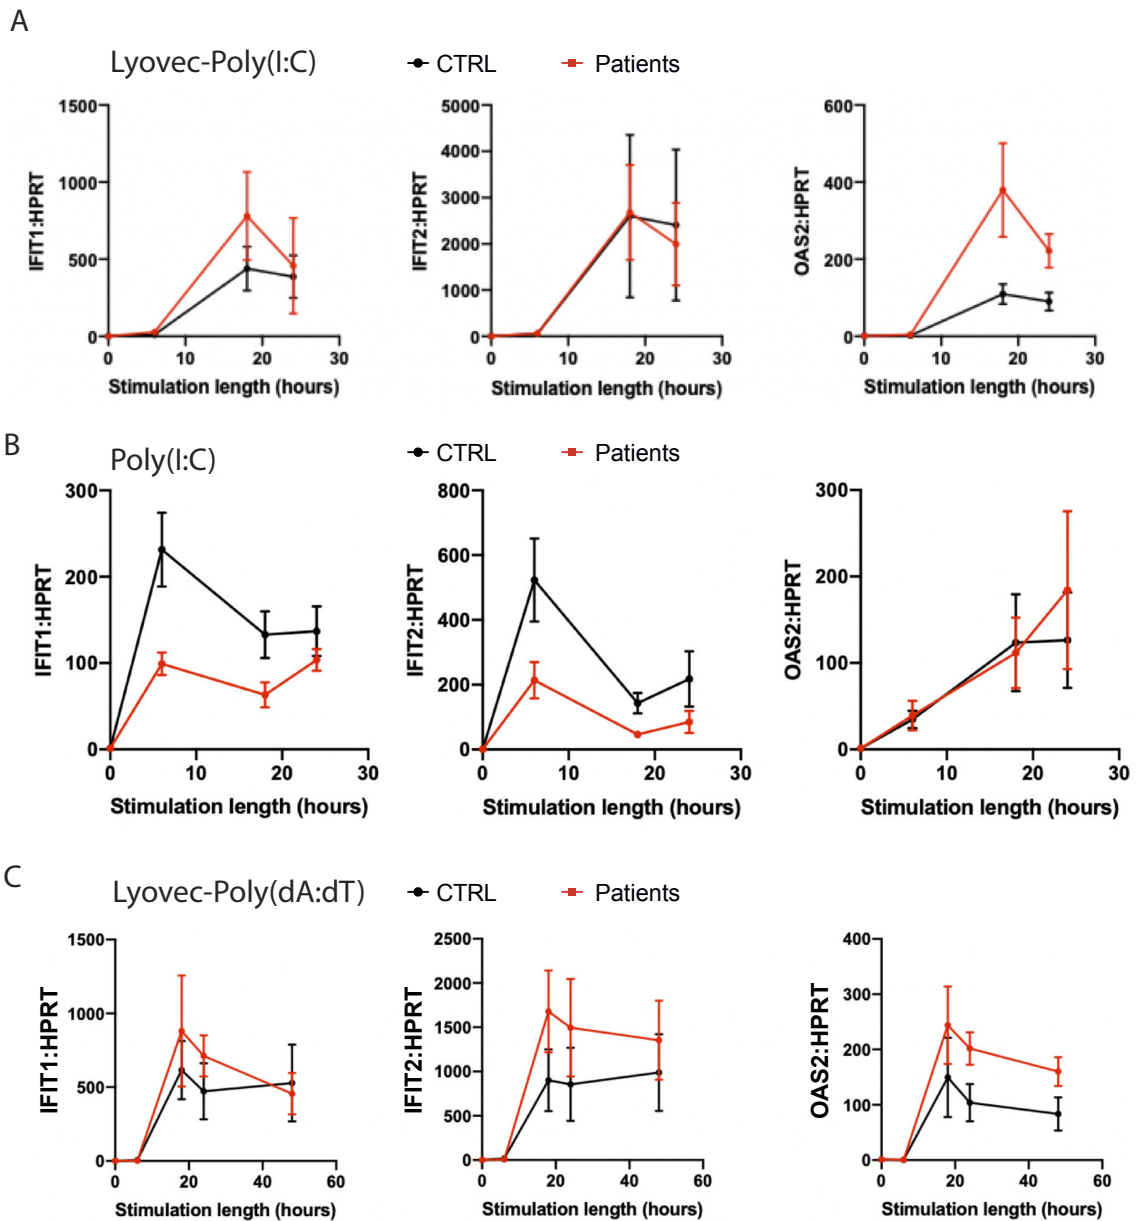

840  
 841 **Fig. S7:** qPCR of IFIT1, IFIT2 and OAS2 expression, normalized to the housekeeping gene HPRT, in  
 842 dermal fibroblasts stimulated with transfected poly(I:C) (Lyovec-Poly(I:C)), soluble poly(I:C) (Poly(I:C))  
 843 or transfected poly(dA:dT) (Lyovec-Poly(dA:dT)) for the indicated times from P1.2, P2.1, P3.2 and P5.2  
 844 (Patients, red lines) and four controls (CTRL, black lines). Mean of relative amounts ( $\Delta\Delta CT$ ) measured  
 845 in fibroblasts from the 4 patients or 4 controls are expressed relative to the value obtained prior to  
 846 stimulation (time 0 hours) for each individual. Data are representative of 5 independent experiments.  
 847 Bars indicate standard error of the mean.

848

## SUPPLEMENTARY REFERENCES

- 849  
850
- 851 1. Henter JI, Horne A, Arico M, Egeler RM, Filipovich AH, Imashuku S, et al. HLH-2004:  
852 Diagnostic and therapeutic guidelines for hemophagocytic lymphohistiocytosis. *Pediatr*  
853 *Blood Cancer*. 2007;48(2):124-31.
  - 854 2. Squires RH, Jr., Shneider BL, Bucuvalas J, Alonso E, Sokol RJ, Narkewicz MR, et al.  
855 Acute liver failure in children: the first 348 patients in the pediatric acute liver failure  
856 study group. *J Pediatr*. 2006;148(5):652-8.
  - 857 3. Evans CA, Pinner J, Chan CY, Bowyer L, Mowat D, Buckley MF, et al. Fetal diagnosis  
858 of Mowat-Wilson syndrome by whole exome sequencing. *Am J Med Genet A*.  
859 2019;179(10):2152-7.
  - 860 4. Paila U, Chapman BA, Kirchner R, Quinlan AR. GEMINI: integrative exploration of  
861 genetic variation and genome annotations. *PLoS Comput Biol*. 2013;9(7):e1003153.
  - 862 5. Richards S, Aziz N, Bale S, Bick D, Das S, Gastier-Foster J, et al. Standards and  
863 guidelines for the interpretation of sequence variants: a joint consensus recommendation  
864 of the American College of Medical Genetics and Genomics and the Association for  
865 Molecular Pathology. *Genet Med*. 2015;17(5):405-24.
  - 866 6. Amendola LM, Jarvik GP, Leo MC, McLaughlin HM, Akkari Y, Amaral MD, et al.  
867 Performance of ACMG-AMP Variant-Interpretation Guidelines among Nine Laboratories  
868 in the Clinical Sequencing Exploratory Research Consortium. *Am J Hum Genet*.  
869 2016;99(1):247.
  - 870 7. Nykamp K, Anderson M, Powers M, Garcia J, Herrera B, Ho YY, et al. Sherlock: a  
871 comprehensive refinement of the ACMG-AMP variant classification criteria. *Genet Med*.  
872 2017;19(10):1105-17.
  - 873 8. Karbassi I, Maston GA, Love A, DiVincenzo C, Braastad CD, Elzinga CD, et al. A  
874 Standardized DNA Variant Scoring System for Pathogenicity Assessments in Mendelian  
875 Disorders. *Hum Mutat*. 2016;37(1):127-34.
  - 876 9. Thorvaldsdottir H, Robinson JT, Mesirov JP. Integrative Genomics Viewer (IGV):  
877 high-performance genomics data visualization and exploration. *Brief Bioinform*.  
878 2013;14(2):178-92.
  - 879 10. Sobreira N, Schiettecatte F, Valle D, Hamosh A. GeneMatcher: a matching tool for  
880 connecting investigators with an interest in the same gene. *Hum Mutat*. 2015;36(10):928-  
881 30.
  - 882 11. Marchler-Bauer A, Lu S, Anderson JB, Chitsaz F, Derbyshire MK, DeWeese-Scott C,  
883 et al. CDD: a Conserved Domain Database for the functional annotation of proteins.  
884 *Nucleic Acids Res*. 2011;39(Database issue):D225-9.
  - 885 12. Marchler-Bauer A, Anderson JB, Derbyshire MK, DeWeese-Scott C, Gonzales NR,  
886 Gwadz M, et al. CDD: a conserved domain database for interactive domain family analysis.  
887 *Nucleic Acids Res*. 2007;35(Database issue):D237-40.
  - 888 13. Lu S, Wang J, Chitsaz F, Derbyshire MK, Geer RC, Gonzales NR, et al. CDD/SPARCLE:  
889 the conserved domain database in 2020. *Nucleic Acids Res*. 2020;48(D1):D265-D8.
  - 890 14. Zimmermann L, Stephens A, Nam SZ, Rau D, Kubler J, Lozajic M, et al. A Completely  
891 Reimplemented MPI Bioinformatics Toolkit with a New HHpred Server at its Core. *J Mol*  
892 *Biol*. 2018;430(15):2237-43.
  - 893 15. Fiser A, Sali A. Modeller: generation and refinement of homology-based protein  
894 structure models. *Methods Enzymol*. 2003;374:461-91.
  - 895 16. De Lano WL. Pymol: An open-source molecular graphics tools. *CCP4 Newsletter*  
896 *on Protein Crystallography* 2002;40:82-92.
  - 897
  - 898

899 1. Squires RH, Jr., Shneider BL, Bucuvalas J, Alonso E, Sokol RJ, Narkewicz MR, et al.  
900 Acute liver failure in children: the first 348 patients in the pediatric acute liver failure  
901 study group. *J Pediatr.* 2006;148(5):652-8.  
902
